# Supplementary material for: Genetic modifiers of long‐term survival in sickle cell anemia
Source: PubMed Central journal article supplement (PMC7423184; doi:10.1002/ctm2.152), 2020-08-12
Supplement: CTM2-10-e152-s001.pdf [file CTM2-10-e152-s001.pdf]

# Supplemental reports

## Contents

|                                                                       |           |
|-----------------------------------------------------------------------|-----------|
| <b>Supplemental figures and legends.....</b>                          | <b>2</b>  |
| Figure S1.....                                                        | 3         |
| Figure S2.....                                                        | 4         |
| Figure S3.....                                                        | 5         |
| Figure S4.....                                                        | 6         |
| Figure S5.....                                                        | 7         |
| Figure S6.....                                                        | 8         |
| Figure S7.....                                                        | 9         |
| Figure S8.....                                                        | 10        |
| Figure S9.....                                                        | 11        |
| <br>                                                                  |           |
| <b>Supplemental tables.....</b>                                       | <b>12</b> |
| Table S1.....                                                         | 13        |
| Table S2.....                                                         | 16        |
| Table S3.....                                                         | 17        |
| Table S4.....                                                         | 19        |
| Table S5.....                                                         | 22        |
| <br>                                                                  |           |
| <b>Supplemental methods.....</b>                                      | <b>33</b> |
| Introduction.....                                                     | 33        |
| Library Construction and Sequence.....                                | 34        |
| Reads Mapping and Alignment.....                                      | 35        |
| Variant Calling.....                                                  | 36        |
| Variant Calling Quality Control and Final Call-set.....               | 36        |
| Variant Annotation and Mutation Prioritization.....                   | 37        |
| Network and Enrichment Analysis.....                                  | 38        |
| Further Characterization of Enriched Sub-networks.....                | 39        |
| Aggregating Summary Statistics at the Gene and Sub-network Level..... | 40        |
| Phased and Haplotypes Inference.....                                  | 41        |
| Fine-scale Population Structure.....                                  | 42        |
| <br>                                                                  |           |
| <b>Supplemental references.....</b>                                   | <b>46</b> |

## Supplemental figures and legends

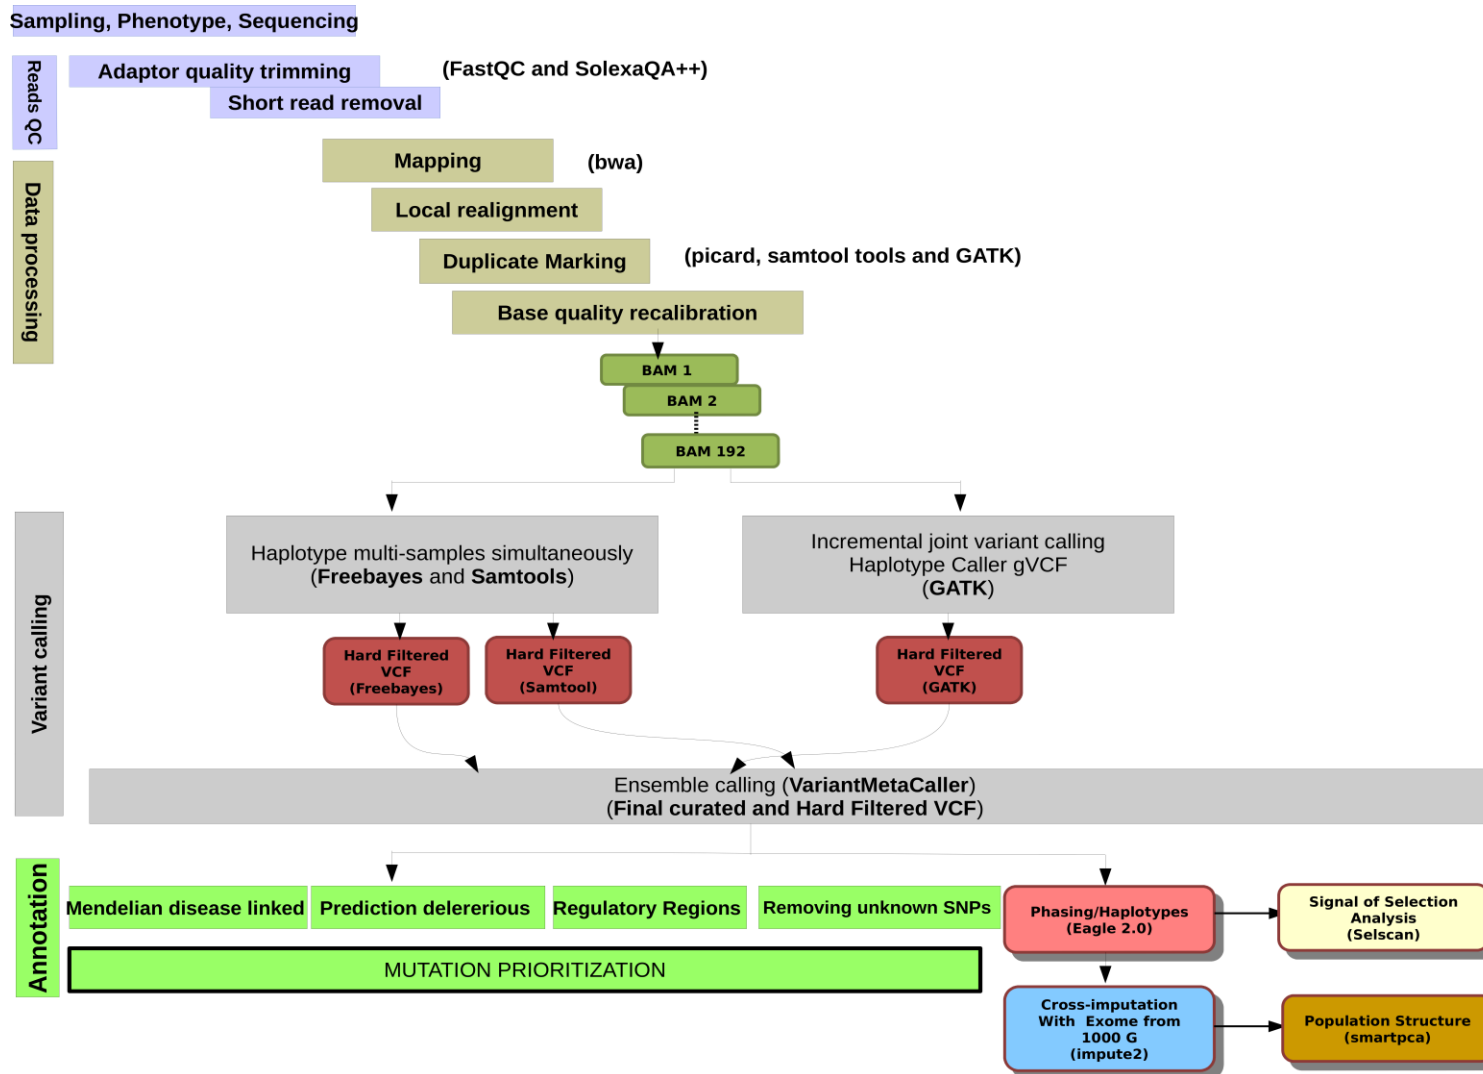

Figure S1. Workflow of the data analysis.

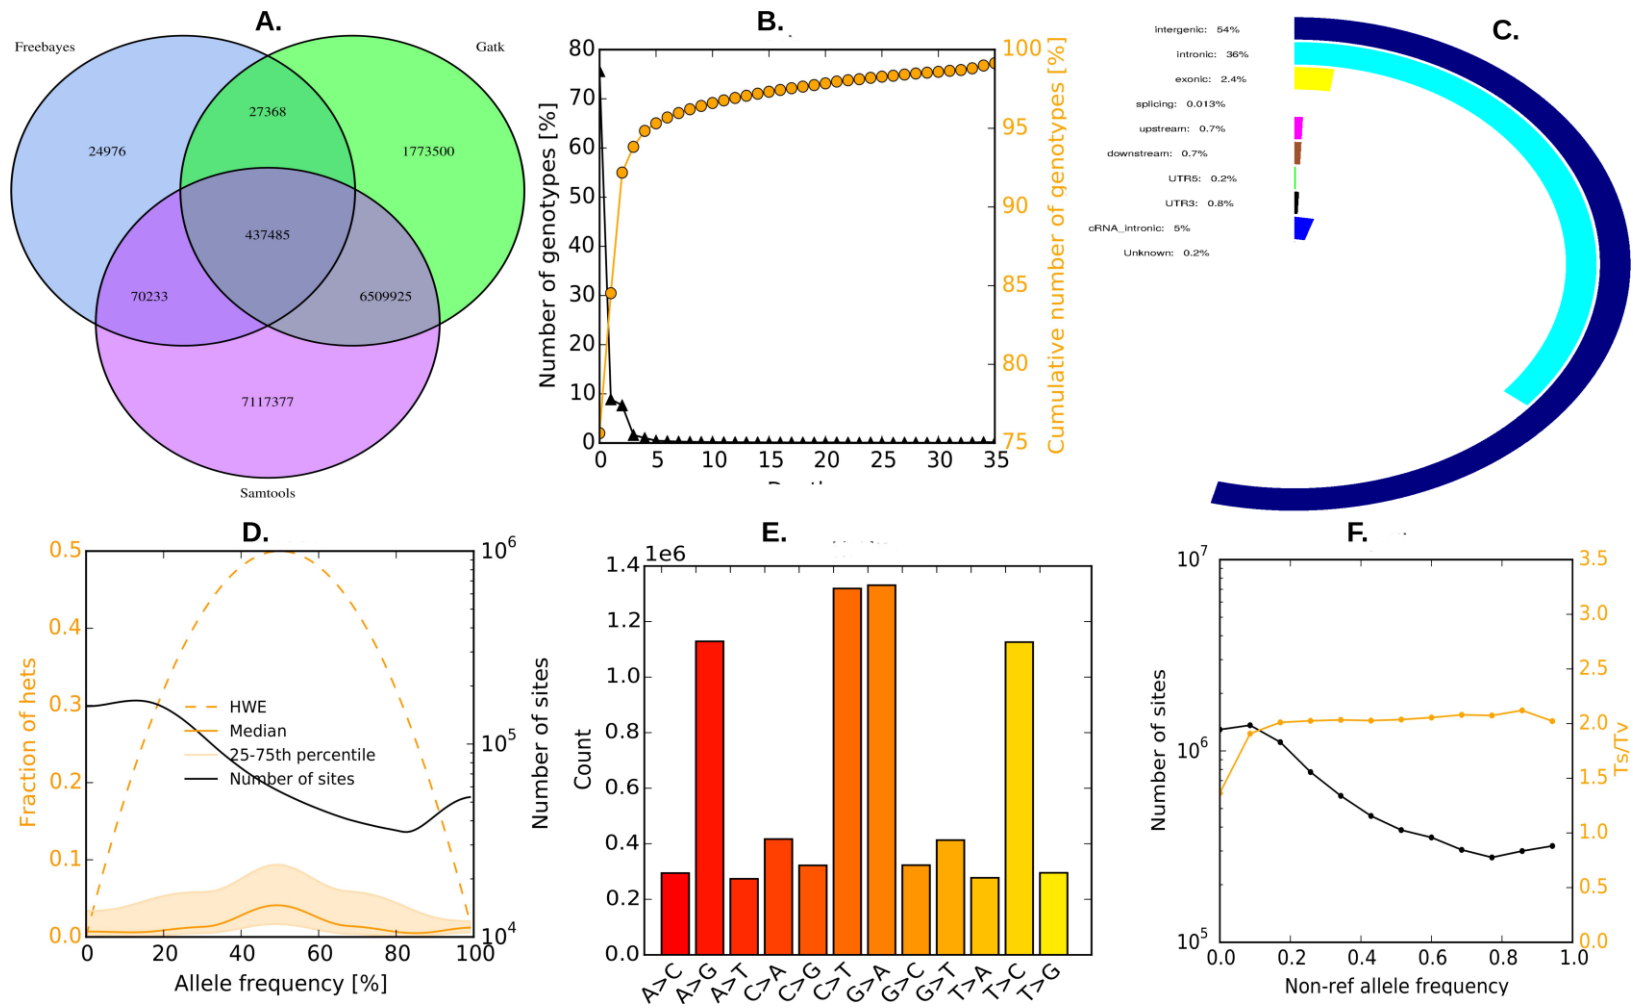

**Figure S2, SCD exome map quality.** A, the Venn diagram shows the overlap of variants between three variant caller methods used, gatk, samtool and freebayes. B, Overall depth distribution of SCD exome map. C, overall percentage of variant functions from 8,458,386 variants. D, Number of heterozygous by allele frequency. E, Substitution types. F, Ts/Tv by allele frequency.

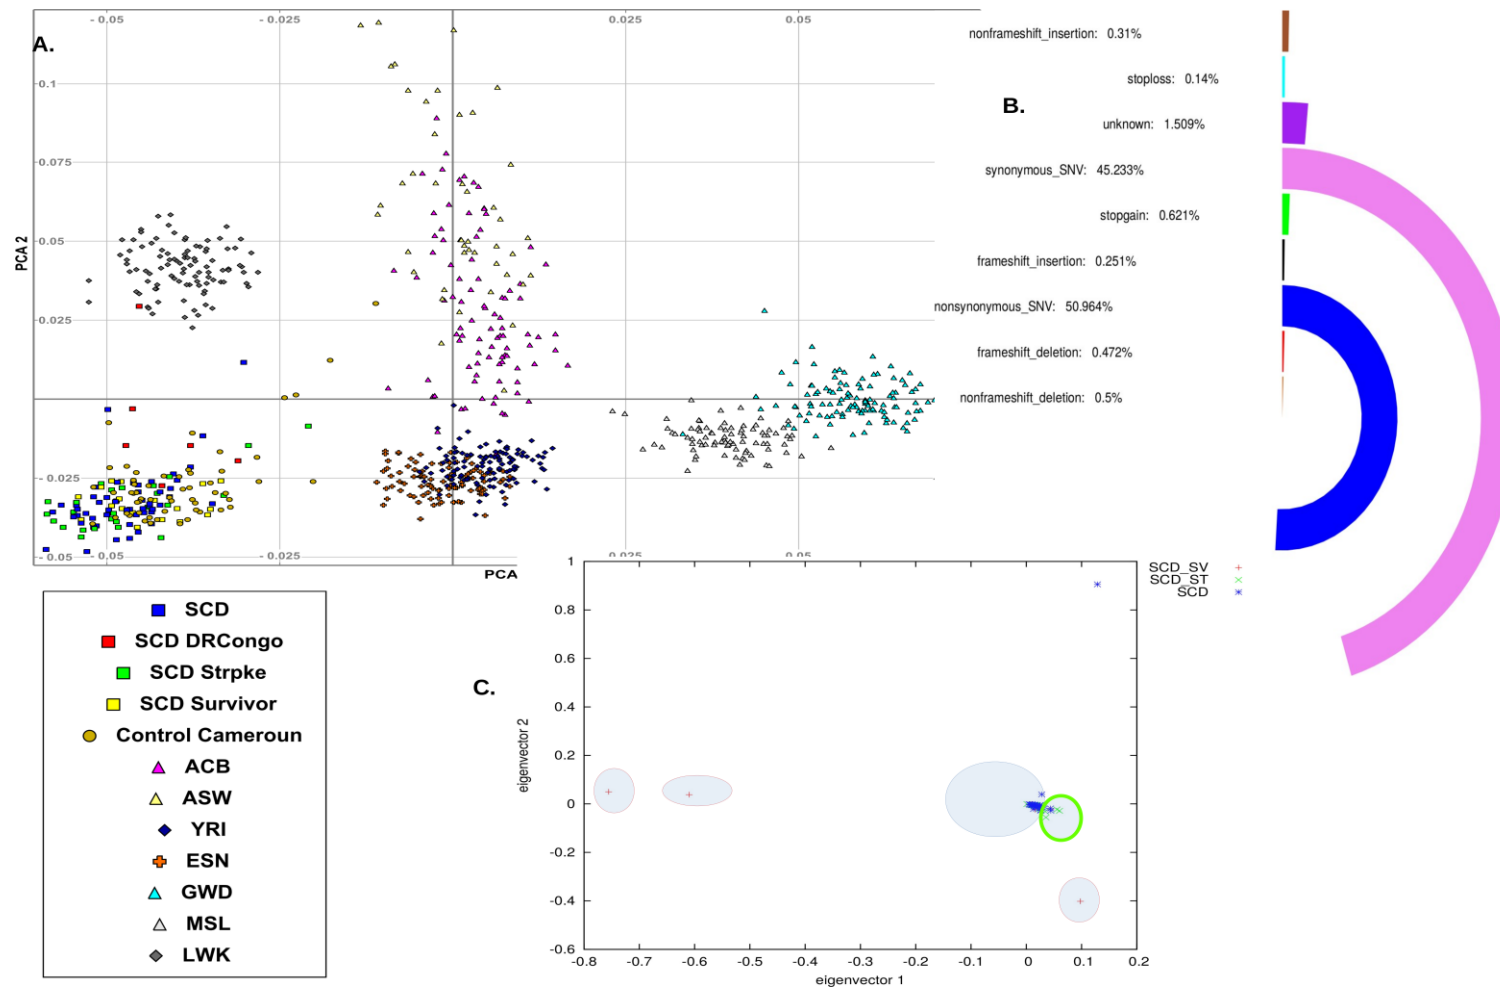

**Figure S3. Comparison of SCD exome map with recently 1000 Genomes release.** A, principal component analysis of the three Cameroonian SCD sub-groups (“Random”, “Stroke” and “Survival”), and continental samples from 1000 Genomes phase 3 release. Both components show a close relationship between the SCD and Africans than non-Africans. B, overall percentage of exonic variant functions of 8,458,386 variants. C, principal component analysis of the three SCD groups (“random”, “Stroke” and “Survival”), showing a slight departure of survival to the rest of other SCD patients. D, the Venn diagram shows the overlap of SCD exome map and 1000 Genomes release phase3.

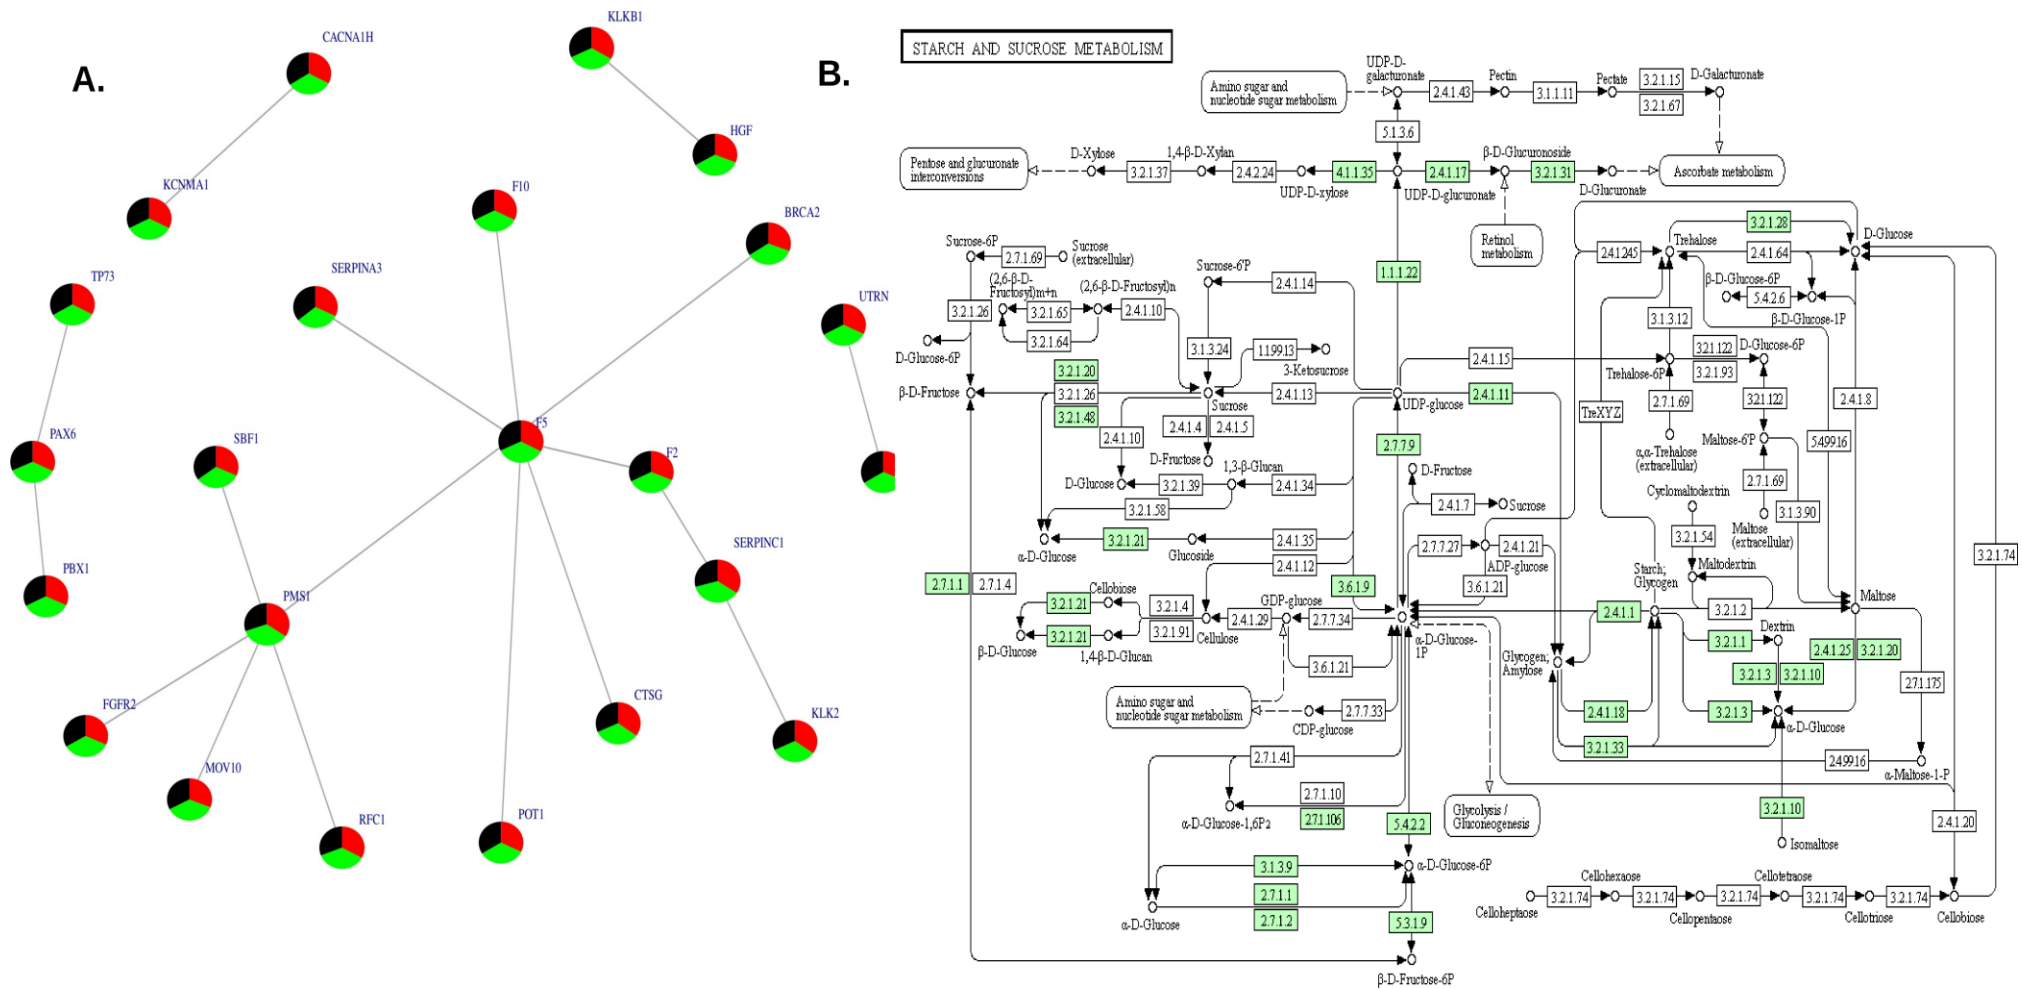

**Figure S4. Biological sub-network of the identified candidate mutations in ‘long survivor’ SCD patients.** A, sub-networks of the identified candidate mutation in the survival. B, diagram of the top significant pathways associated with the identified candidate mutations.

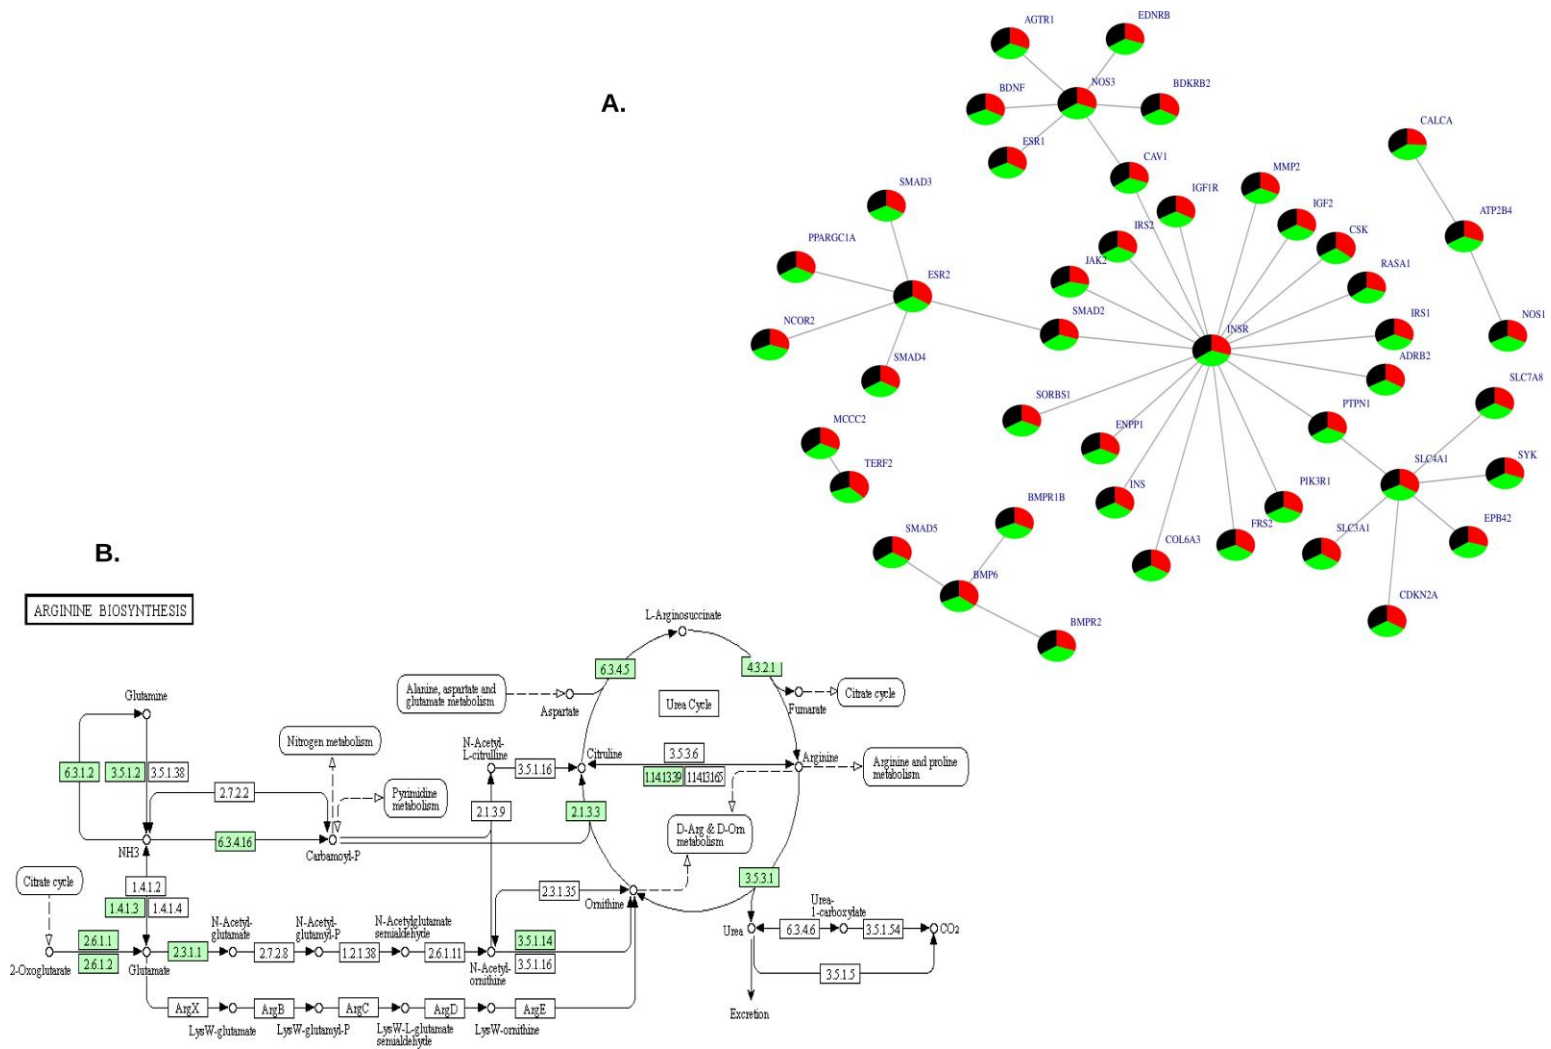

**Figure S5. Biological sub-network of the identified candidate gene mutations in SCD patients with stroke.** A, sub-networks of the identified candidate mutation in SCD with stroke. B, diagram of the top significant pathways associated with the identified candidate mutations.

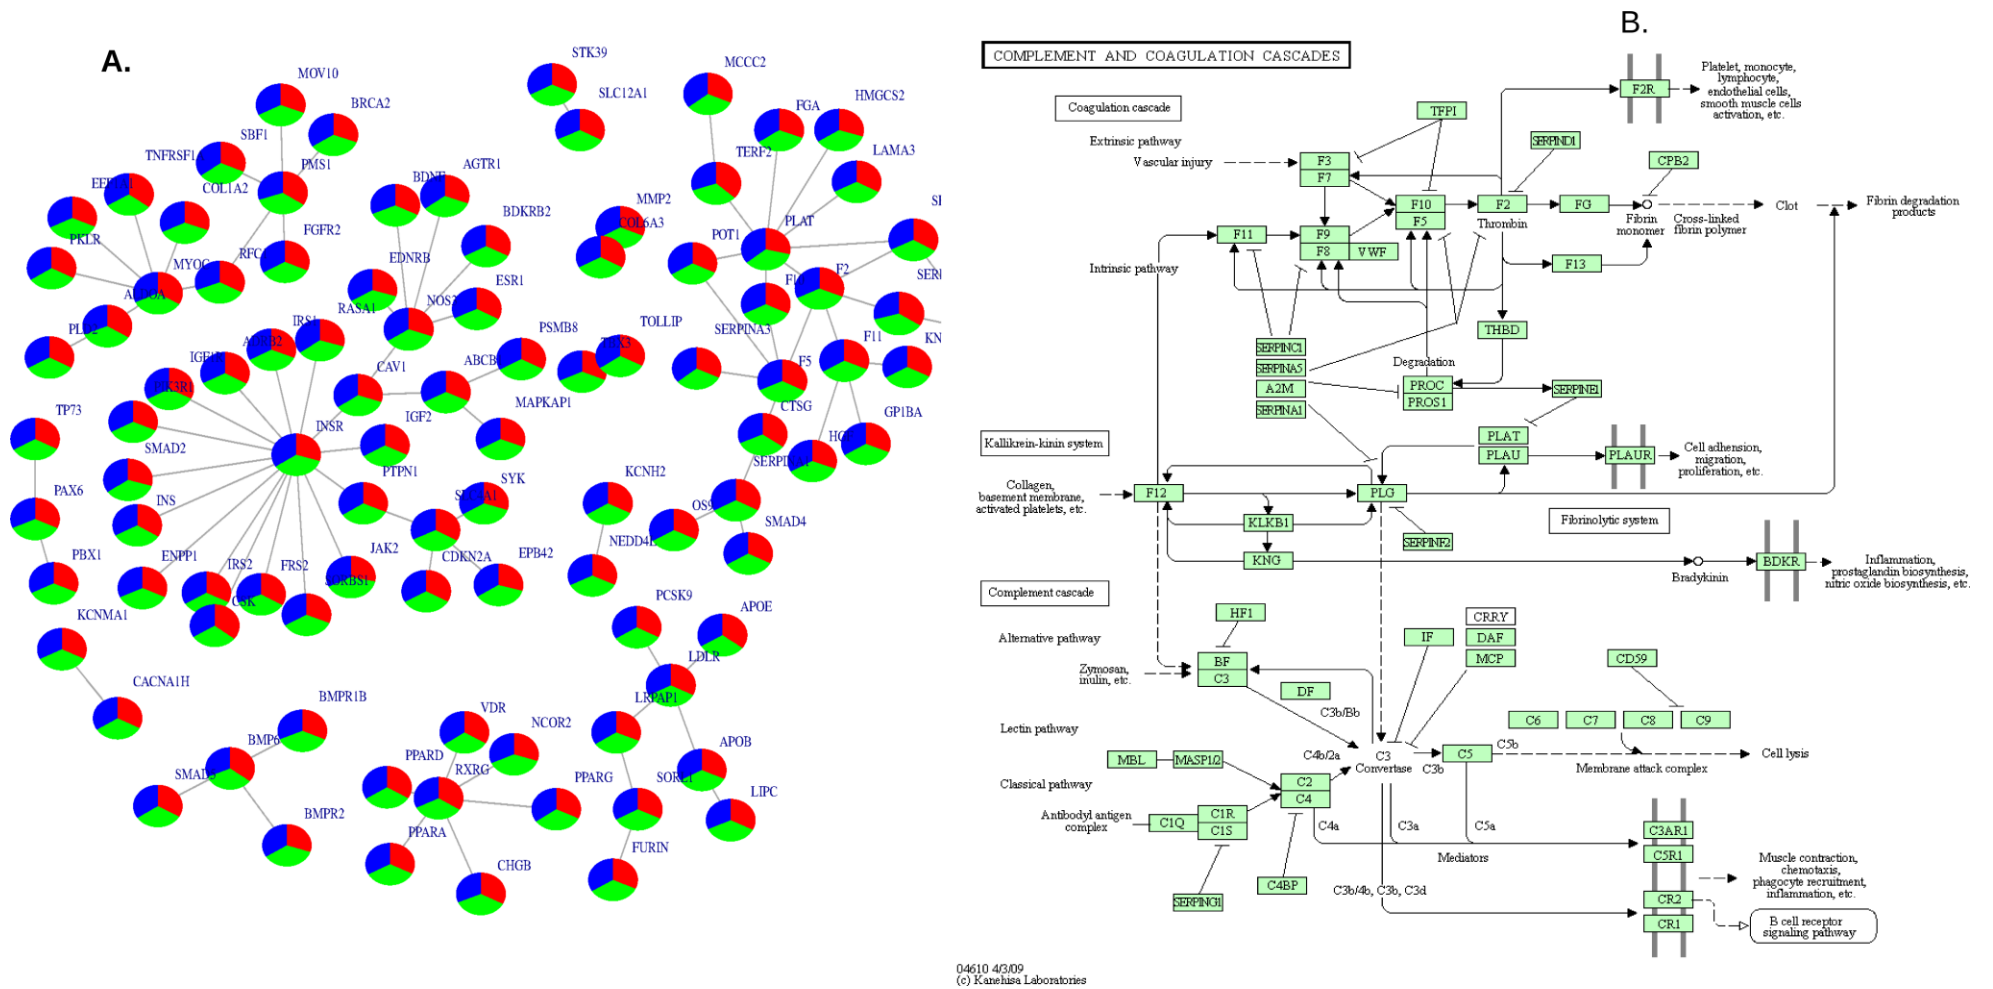

**Figure S6. Biological sub-network of the identified candidate mutations in “random” SCD patients’ group.** A, sub-networks of the identified candidate mutation in the normal SCD. B, diagram of the top significant pathways associated with the identified candidate mutations.



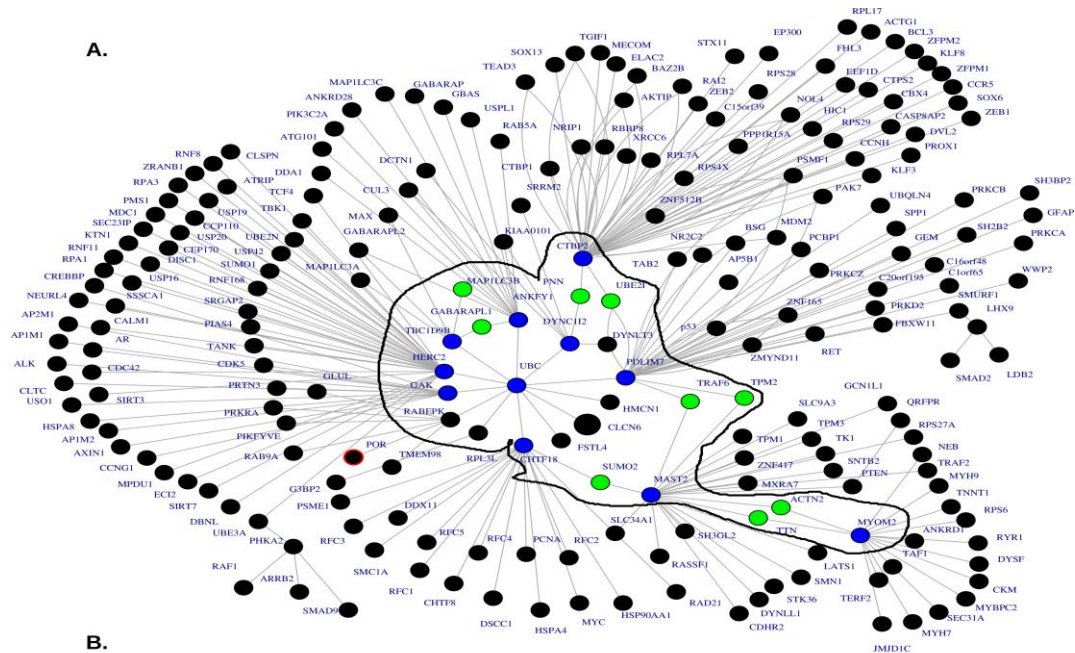

Table: Pathways Associated to the network formed with genes interacting with identified mutation genes in SCD DRC (see Extended Table 2).

| Biological Pathways                         | Enrichment Pvalues | Adjusted Pvalues | Searched databases                  |
|---------------------------------------------|--------------------|------------------|-------------------------------------|
| <i>Focal adhesion</i>                       | 2.2e-21            | 1.1e-19          | BioCarta, KEGG, NCI-Nature, Panther |
| <i>Angiogenesis</i>                         | 1.7e-20            | 9e-15            | BioCarta, KEGG, Panther             |
| <i>Actions of Nitric Oxide in the Heart</i> | 9.14e-09           | 3.5e-07          | BioCarta, KEGG, NCI-Nature, Panther |
| <i>Regulation of actin cytoskeleton</i>     | 1e-109             | 1e-07            | KEGG, Panther                       |
| <i>Longevity regulating pathway</i>         | 5.9e-09            | 2.8e-08          | BioCarta, KEGG, NCI-Nature, Panther |
| <i>Complement and coagulation cascades</i>  | 3.9e-08            | 1.5e-07          | KEGG, NCI-Nature, Panther           |
| <i>Oxytocin signaling pathway</i>           | 1.8e-06            | 5.1e-06          | KEGG, BioCarta                      |
| <i>Calcium signaling pathway</i>            | 5.8e-06            | 1.5e-05          | BioCarta                            |

**Figure S7. Biological sub-network of the identified candidate gene mutations in SCD patients a replication cohort of 29 SCD patients from DRC.** A, sub-networks of the identified candidate mutation. B, diagram of the top significant pathways associated with the identified candidate mutations.

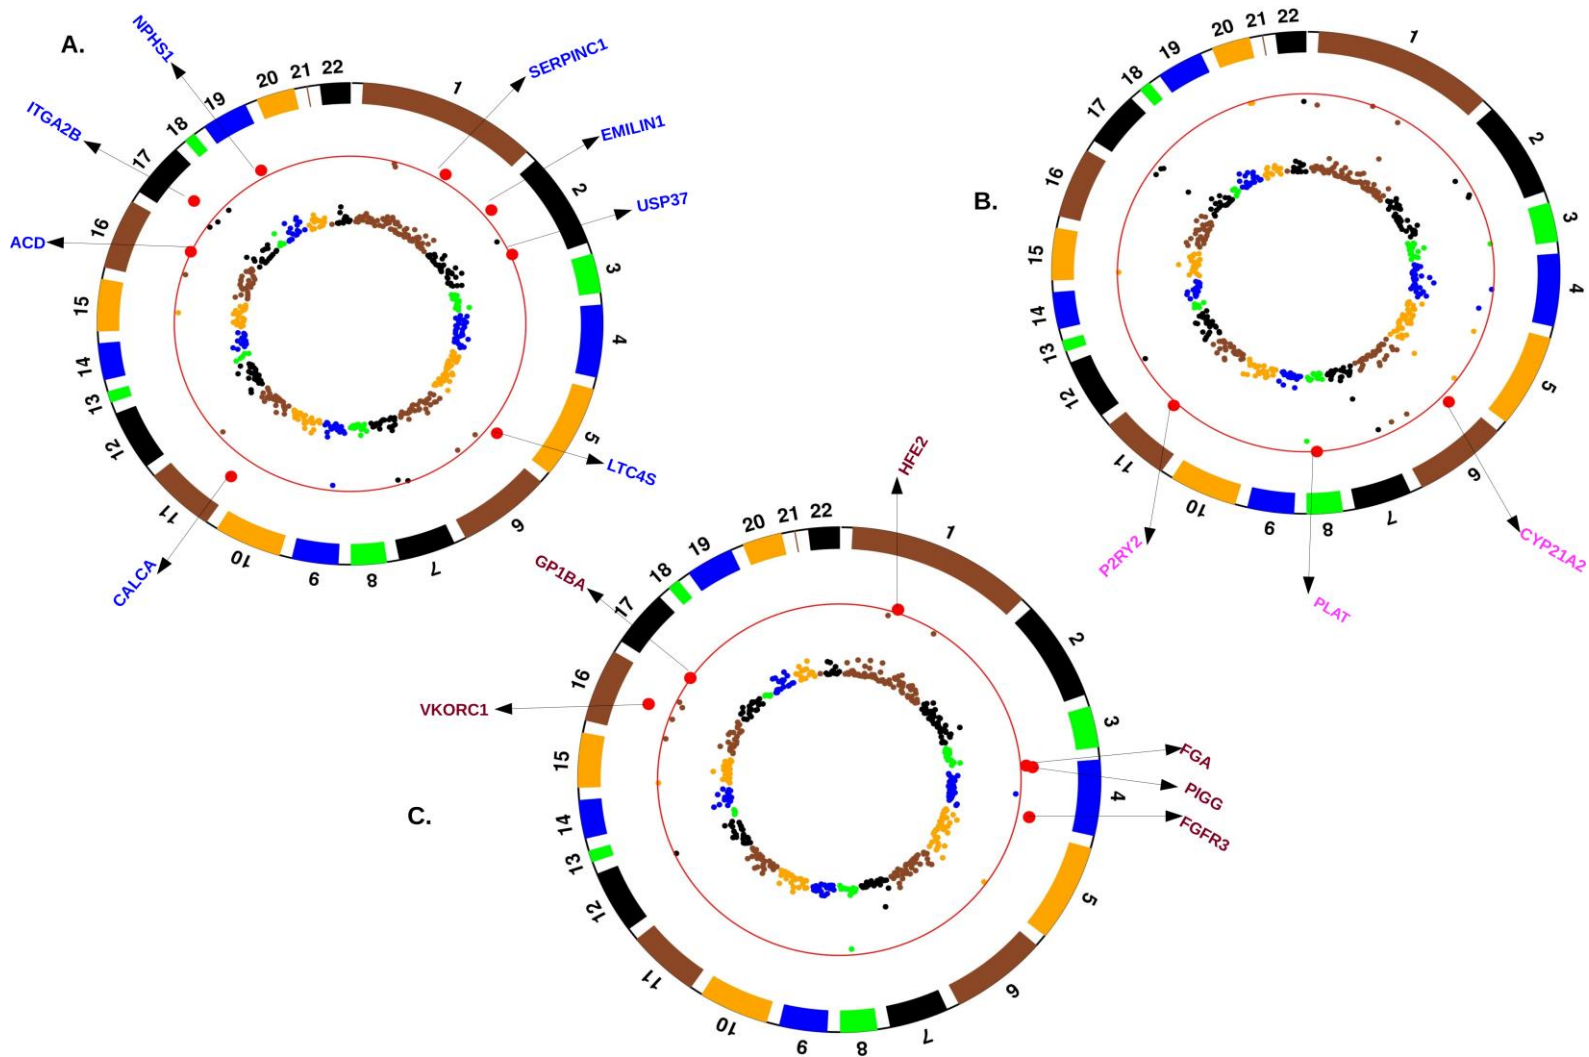

**Figure S8. Circular Manhattan plot of gene-specific signal of unusual difference in SNPs frequencies.** A, unusual gene-specific frequency difference between SCA with stroke, and the rest of SCA patients. B, gene-specific signal of unusual genetic difference between “long survivor” patients and the rest of SCA patients. C, unusual differentiation between SCA with stroke and “long survivor” SCA patients. **Table S3** displays the results of Cameroon control versus each the above SCA group.

**A.**  
Significant human pathways associated to genes of large departure of unusual gene-specific difference between survival, and other SCD patients.

| Term                                | P-value | Adjusted P-value | Z     | Combined Score |
|-------------------------------------|---------|------------------|-------|----------------|
| Complement and Coagulation Cascades | 0.00007 | 0.006            | -1.91 | 9.61           |
| Blood Clotting Cascade              | 0.0006  | 0.02             | -1.91 | 7.30           |
| TP53 Network                        | 0.002   | 0.03             | -1.77 | 5.72           |

**C.**  
Significant human biological process associated to genes shown unusual gene-specific difference between survival, and other SCD patients.

| Term                                             | P-value  | Adjusted P-value | Z-score | Combined Score |
|--------------------------------------------------|----------|------------------|---------|----------------|
| fibrinolysis (GO:0042730)                        | 0.000006 | 0.006            | -2.82   | 14.41          |
| response to oxygen levels (GO:0070482)           | 0.00009  | 0.009            | -2.49   | 11.73          |
| response to decreased oxygen levels (GO:0036293) | 0.00007  | 0.009            | -2.48   | 11.67          |
| response to hypoxia (GO:001666)                  | 0.00007  | 0.009            | -2.47   | 11.66          |
| mitotic G1/S transition checkpoint (GO:0044819)  | 0.0002   | 0.01             | -2.68   | 11.33          |
| G1 DNA damage checkpoint (GO:0044783)            | 0.0002   | 0.01             | -2.65   | 11.22          |

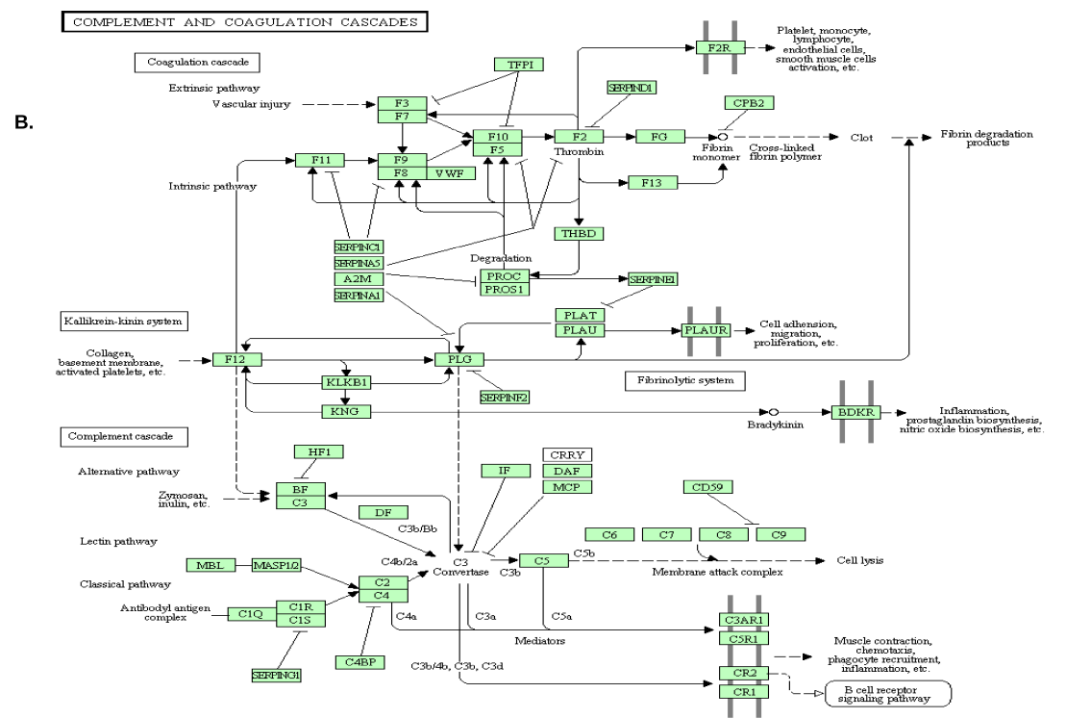

**Figure S9. Significant pathways and Biological processes associated to gene-specific difference in SNPs frequency between “long survivor” and other SCD patients.** A. Significant pathways associated to genes exhibited a large unusual gene-specific difference between “long survivor” group and other SCD patients. B. diagram of the top significant pathway in panel A. C. Significant biological processes associated to genes with unusual departure of gene-specific exome wide difference between “long survivor” and other SCD patients.

## Supplemental Tables

**Table S1. Genes with mutations in SCD patients from Cameroon. The Z-score is obtained from aggregating the SiPhy (29-way) score based on identified mutants SNPs within gene (See details in Table S4 of mutation in polymorphisms within reported genes). The reported Homozygous; heterozygous, compound heterozygous, cDNA change, Protein change, and all ExAc frequencies are from the polymorphism with top SiPhy (29-way) score.**

| CHR | Max # SV | Max # Patients | Region   | Genotypes | Gene            | Gene name                                                           | cDNA Change    | Protein Change | ExAC AFR | ExAC EUR | “Random” SCD Z-score | SCD with stroke Z-score | “Long Survivor” SCD Z-score |
|-----|----------|----------------|----------|-----------|-----------------|---------------------------------------------------------------------|----------------|----------------|----------|----------|----------------------|-------------------------|-----------------------------|
| 2   | 11       | 69/105         | 2q34     | Hom       | <i>CPS1</i>     | Carbamoyl-phosphate synthetase 1, mitochondrial                     | c.C1086G       | p.V362V        | 0        | 0.01     | 20-86                | 20-86                   | 20-86                       |
| 2   | 7        | 82/105         | 2p13.1   | Hom       | <i>SLC4A5</i>   | Solute carrier family 4, sodium bicarbonate cotransporter, member 5 | c.C2790T       | p.T930T        | 0-0003   | 0        | 15-65                | 15-65                   | 15-65                       |
| 11  | 12       | 83/105         | 11q13.4  | Hom       | <i>NADSYN1</i>  | NAD synthetase 1                                                    | c.G256A        | p.V86M         | 0        | 0        | 15-15                | 15-5                    | 15-15                       |
| 16  | 3        | 79/105         | 16p13.3  | Hom       | <i>CACNA1H</i>  | Calcium channel, voltage-dependent, T type, alpha 1H subunit        | c.G93A         | p.E31E         | 0        | 0        | 15-05                | 15-18                   | 15-05                       |
| 20  | 2        | 76/105         | 20p11.21 | Het       | <i>PYGB</i>     | Phosphorylase, glycogen; brain                                      | c.G907T        | p.A303S        | 0        | 0        | 18-71                | 18-71                   | 18-71                       |
| 1   | 3        | 47/82          | 1q25.1   | Het       | <i>SERPINC1</i> | Serpin peptidase inhibitor, clade C , member 1                      | c.A1011A       | p.Q337Q        | 0        | 0        | 19-75                | 19-75                   | -                           |
| 1   | 14       | 68/82          | 1q24.2   | Het       | <i>F5</i>       | Coagulation factor V                                                | c.2247_2249del | p.749_750del   | -        | -        | 17-62                | 17-62                   | -                           |
| 2   | 8        | 41/82          | 2q32.2   | Het       | <i>PMS1</i>     | PMS1 postmeiotic segregation increased 1                            | c.T141C        | p.Y47Y         | 0        | 0        | 19-13                | 18-06                   | -                           |
| 10  | 6        | 58/82          | 10p14    | Het       | <i>GATA3</i>    | GATA binding protein 3                                              | c.T606C        | p.R202R        | -        | -        | 18-28                | 18-28                   | -                           |
| 11  | 2        | 49/82          | 11p13    | Het       | <i>PAX6</i>     | Paired box 6                                                        | c.C1139T       | p.S380L        | -        | -        | 20-86                | 20-86                   | -                           |
| 19  | 5        | 67/82          | 19q13.11 | Het       | <i>GPI</i>      | Glucose phosphate isomerase                                         | c.G7A          | p.A3T          | 0        | 0        | 15-39                | 15-39                   | -                           |
| 19  | 3        | 53/79          | 19p13.2  | Het       | <i>INSR</i>     | Insulin receptor                                                    | c.C3255T       | p.H1085H       | 0        | 0        | 15-83                | -                       | 15-83                       |
| 7   | 7        | 66/79          | 7q36.1   | Het       | <i>NOS3</i>     | Nitric oxide synthase 3                                             | c.341_348del   | p.S114fs       | 0        | 0        | 15-73                | -                       | 15-73                       |
| 5   | 3        | 40/79          | 5q13.2   | Het       | <i>MCCC2</i>    | Methylcrotonoyl-Coenzyme A carboxylase 2 (beta)                     | c.T969C        | p.A323A        | -        | -        | 18-04                | -                       | 18-04                       |

|    |    |       |          |      |                 |                                                                   |              |              |        |   |        |       |        |
|----|----|-------|----------|------|-----------------|-------------------------------------------------------------------|--------------|--------------|--------|---|--------|-------|--------|
| 17 | 14 | 51/79 | 17q21.31 | Hom  | <i>SLC4A1</i>   | Solute carrier family 4, anion exchanger, member 1                | c.T2688C     | p.D896D      | -      | - | 19-270 | -     | 18-79  |
| 5  | 2  | 38/79 | 5p15.31  | Het  | <i>MTRR</i>     | 5-methyltetrahydrofolate-homocysteine methyltransferase reductase | c.A147G      | p.I49M       | -      | - | 19-16  | -     | 19-16  |
| 2  | 9  | 54/79 | 2q37.3   | Hom  | <i>COL6A3</i>   | Collagen, type VI, alpha 3                                        | c.G3446A     | p.R1149Q     | 0      | 0 | 19-472 | -     | 16-95  |
| 6  | 13 | 62/79 | 6p24.3   | Hom  | <i>BMP6</i>     | Bone morphogenetic protein 6                                      | c.566delC    | p.A189fs     | -      | - | 19-70  | -     | 19-75  |
| 6  | 1  | 37/79 | 6q23.2   | Het  | <i>VNN1</i>     | Vanin 1                                                           | c.T1540C     | p.X514Q      | 0      | 0 | 20-64  | -     | 20-64  |
| 5  | 8  | 15/26 | 5q31.1   | cHet | <i>SLC22A5</i>  | Solute carrier family 22 , member 5                               | c.280delG    | p.A94fs      | -      | - | -      | 16-82 | -      |
| 7  | 1  | 17/26 | 7q21.11  | Het  | <i>HGF</i>      | Hepatocyte growth factor                                          | c.T696C      | p.H232H      | 0      | 0 | -      | 19-91 | -      |
| 8  | 3  | 13/26 | 8q24.12  | Het  | <i>SNTB1</i>    | Syntrophin, beta 1                                                | c.C1338T     | p.C446C      | 0      | 0 | -      | 19-27 | -      |
| 15 | 1  | 11/26 | 15q15.1  | cHet | <i>IVD</i>      | Isovaleryl Coenzyme A dehydrogenase                               | c.C20T       | p.A7V        | -      | - | -      | 18-85 | -      |
| 16 | 7  | 9/26  | 16p13.11 | cHet | <i>ABCC1</i>    | ATP-binding cassette, sub-family C , member 1                     | c.C33T       | p.G11G       | 0      | 0 | -      | 19-56 | -      |
| 1  | 14 | 19/26 | 1q32.1   | Hom  | <i>ATP2B4</i>   | ATPase, Ca++ transporting, plasma membrane 4                      | c.A111A      | p.S37S       | 0-0004 | 0 | -      | -     | 20-19  |
| 1  | 11 | 20/23 | 1p36.22  | Hom  | <i>CLCN6</i>    | Chloride channel 6                                                | c.G234A      | p.A78A       | 0      | 0 | -      | -     | 19-058 |
| 10 | 5  | 21/23 | 10q11.23 | Hom  | <i>OGDHL</i>    | Oxoglutarate dehydrogenase-like                                   | c.G2931A     | p.A977A      | 0      | 0 | -      | -     | 19-95  |
| 14 | 2  | 19/23 | 14q23.2  | Het  | <i>ESR2</i>     | Estrogen receptor 2                                               | c c.A1421C   | p.K474T      | 0      | 0 | -      | -     | 19-521 |
| 14 | 2  | 13/23 | 14q11.2  | cHet | <i>SLC7A8</i>   | Solute carrier family 7                                           | c.T1170T     | p.Y390Y      | -      | - | -      | --    | 19-102 |
| 1  | 9  | 16/23 | 1q24.3   | Het  | <i>MYOC</i>     | Myocilin, trabecular meshwork inducible glucocorticoid response   | c.553_555del | p.185_185del | -      | - | 18-543 | -     | -      |
| 1  | 1  | 15/23 | 1q23.3   | Hom  | <i>RXRG</i>     | Retinoid X receptor, gamma                                        | c.118_120del | p.40_40del   | -      | - | 16-973 | -     | -      |
| 2  | 4  | 12/23 | 2p23.1   | Het  | <i>CAPN13</i>   | Calpain 13                                                        | c.T1787C     | p.I596T      | 0      | 0 | 18-074 | -     | -      |
| 2  | 11 | 9/23  | 2q14.3   | Het  | <i>MYO7B</i>    | Myosin VIIIB                                                      | c.A702G      | p.Q234Q      | 0-0006 | 0 | 17-660 | -     | -      |
| 4  | 13 | 17/23 | 4q35.2   | Hom  | <i>F11</i>      | Coagulation factor XI                                             | c.C453T      | p.Y151Y      | 0      | 0 | 16-585 | -     | -      |
| 7  | 4  | 26/56 | 7q22.1   | Het  | <i>SERPINE1</i> | Serpin peptidase inhibitor, clade E, member 1                     | c.G49A       | p.V17I       | -      | - | 16-256 | -     | -      |
| 7  | 4  | 31/56 | 7q36.1   | Hom  | <i>KCNH2</i>    | Potassium voltage-gated channel, subfamily H                      | c.C2900T     | :p.P967L     | 0      | 0 | 15-59  | -     | -      |
| 7  | 6  | 43/56 | 7q21.12  | Hom  | <i>ABCB1</i>    | ATP-binding cassette, sub-family B, member 1                      | c.A4006G     | p.I1336V     | 0      | 0 | 19-362 | -     | -      |

|    |   |       |          |     |                 |                                                               |          |          |                |   |        |   |   |
|----|---|-------|----------|-----|-----------------|---------------------------------------------------------------|----------|----------|----------------|---|--------|---|---|
| 8  | 9 | 21/56 | 8p11.21  | Hom | <i>PLAT</i>     | Plasminogen activator, tissue                                 | c.C1681T | p.R561X  | -              | - | 19-520 | - | - |
| 11 | 1 | 53/56 | 11q24.1  | Het | <i>SORL1</i>    | Sortilin-related receptor, L A repeats-containing             | c.G237A  | p.R79R   | 0-000096<br>15 | 0 | 20-40  | - | - |
| 11 | 3 | 19/56 | 11p15.1  | Het | <i>KCNJ11</i>   | Potassium inwardly-rectifying channel, subfamily J, member 11 | c.A828G  | p.S276S  | -              | - | 18-636 | - | - |
| 12 | 5 | 23/56 | 12q24.21 | Het | <i>TBX3</i>     | T-box 3                                                       | c.T1186A | p.S396T  | -              | - | 18-243 | - | - |
| 14 | 8 | 47/56 | 14q32.13 | Het | <i>SERPINA1</i> | Serpin peptidase inhibitor, clade A                           | c.A1200C | p.E400D  | 0              | 0 | 20-05  | - | - |
| 15 | 2 | 39/56 | 15q21.1  | Hom | <i>SLC12A1</i>  | Solute carrier family 12 , member 1                           | c.A200G  | p.Q67R   | 0              | 0 | 19-286 | - | - |
| 15 | 2 | 29/56 | 15q21.3  | Hom | <i>LIPC</i>     | Lipase, hepatic                                               | c.G213A  | p.T71T   | -              | - | 19-267 | - | - |
| 15 | 2 | 19/56 | 15q12    | Hom | <i>ATP10A</i>   | ATPase Phospholipid Transporting 10A                          | c.A4449G | p.Q1483Q | -              | - | 15-42  | - | - |
| 16 | 5 | 28/56 | 16p11.2  | Het | <i>ALDOA</i>    | Aldolase A, fructose-bisphosphate                             | c.A151G  | p.T51A   | 0              | 0 | 18-556 | - | - |
| 19 | 2 | 21/56 | 19p13.2  | Het | <i>LDLR</i>     | Low density lipoprotein receptor                              | c.G1171A | p.A391T  | -              | - | 17-733 | - | - |

<sup>4</sup>Exonic, nonsynonymous variants that were considered damaging according to 21 different functional scores from the annotation databases, including SIFT, Polyphen2\_HDIV, Polyphen2\_HVAR, Likelihood ratio test, MutationTaster, MutationAssessor, FATHMM, fathmm-MKL, RadialSVM, LR, CADD, PROVEAN, MetaSVM and MetaLR, as previously reported.<sup>8</sup> Abbreviations: Hom: Homozygous; Het: heterozygous; cHet: compound heterozygous; #SV: nonsynonymous variants; SNP: Single Nucleotide Polymorphism; ExAC: Exome Aggregation Consortium; AFR: African; EUR: European.

Table S2. Description of the replication study cohort (SCA patients from the Democratic Republic of Congo)

| <i>Variables</i>                         | <i>Categories</i>                 | <i>Mean +/- SD</i> | <i>Value range</i> | <i>Number of observations</i> |
|------------------------------------------|-----------------------------------|--------------------|--------------------|-------------------------------|
| <b>Gender</b>                            | Female/Male (%)                   | 31.8%/69.2%        |                    | 29                            |
| <b>Age (years)</b>                       |                                   | 26.1 ± 9.8         | 18 – 51            | 29                            |
| <b>Hematological indices<sup>1</sup></b> | Hb (g/dl)                         | 9.1 ± 1.8          | 5.6 – 14.0         | 27                            |
|                                          | MCV (fl)                          | 9.1 ± 3.1          | 5.3 – 14.6         | 27                            |
|                                          | WBC (10 <sup>9</sup> /l)          | 8.1 ± 3.0          | 3.0 – 13.6         | 27                            |
|                                          | Platelets (10 <sup>9</sup> /l)    | 334 ± 166.5        | 133 – 737          | 27                            |
|                                          | Neutrophils (10 <sup>9</sup> /l)  | 4.6 ± 0.1          | 2.0 – 10.3         | 27                            |
| <b>Clinical events</b>                   | Age of diagnosis (years)          | 6.8 ± 7.1          | 1 – 39             | 29                            |
|                                          | Vaso-occlusive crisis (No. /year) | 1.5 ± 1.2          | 0 – 5              | 29                            |
|                                          | Stroke                            | 10.3%              |                    | 3/29                          |
|                                          | Leg ulcers                        | 13.8%              |                    | 4/29                          |
|                                          | Hospitalizations (No. /year)      | 2.1 ± 1.4          | 0 - 5              | 29                            |
| <b>Treatment</b>                         | Blood transfusions                | 31.0%              |                    | 9/29                          |
|                                          | Hydroxyurea (mg/day)              | 544.1 ± 144        | 500 – 1000         | 29                            |
| <b>HBB rs334 genotype</b>                | HbSS <sup>2</sup>                 | 100%               |                    | 29/29                         |
| <b>HBB haplotype</b>                     | Bantu/Bantu                       | 50.0%              |                    | 13/26                         |
|                                          | Bantu/Senegal                     | 7.7%               |                    | 2/26                          |
|                                          | Bantu/Benin                       | 7.7%               |                    | 2/26                          |
|                                          | Bantu/Atypical                    | 15.4%              |                    | 4/26                          |
|                                          | Atypical/Atypical                 | 19.2%              |                    | 5/26                          |
| <b>α-globin gene deletion</b>            | αα/αα                             | 57.7%              |                    | 15/26                         |
|                                          | αα/α3.7                           | 42.3%              |                    | 11/26                         |

<sup>1</sup>Hb- Hemoglobin; MCV = mean corpuscular volume; WBCs = white blood cells  
<sup>2</sup>HbSS = genotype homozygous for the causal sickle allele HbS



**Table S3 | Gene with mutations in SCD patients from Democratic Republic of Congo (DRC)<sup>‡</sup>.**

| CHR | Max # SNPs | # Patients | Region   | Gene            | Gene Name                                      | CDNA Change | Protein Change | EXAc AFR  | ExaC EUR  |
|-----|------------|------------|----------|-----------------|------------------------------------------------|-------------|----------------|-----------|-----------|
| 1   | 11         | 12/29      | 1p21.1   | <i>COL11A1</i>  | Collagen Type XI Alpha 1 Chain                 | c.G4025A    | p.G1342D       | 9.617e-05 | 0         |
| 1   | 6          | 9/29       | 1p36.13  | <i>ALDH4A1</i>  | Aldehyde Dehydrogenase 4 Family Member A1      | c.C852A     | p.F284L        | 0         | 1.505e-05 |
| 1   | 4          | 17/29      | 1p36.22  | <i>CLCN6</i>    | Chloride channel 6                             | c.C2436A    | p.F812L        | .         | .         |
| 1   | 8          | 12/29      | 1p36.33  | <i>ATAD3C</i>   | ATPase Family, AAA Domain Containing 3C        | c.G425C     | p.G142A        | 0.0014    | 0         |
| 1   | 1          | 11/29      | 1q25.1   | <i>SERPINC1</i> | Serpin peptidase inhibitor, clade C , member 1 | c.G167A     | p.R56H         | 0         | 0         |
| 2   | 3          | 11/29      | 2p23.1   | <i>CAPN13</i>   | Calpain 13                                     | c.G838A     | p.A280T        | 0.9181    | 0.6884    |
| 2   | 3          | 23/29      | 2q14.3   | <i>MYO7B</i>    | Myosin VIIB                                    | c.G5764A    | p.G1922R       | 0         | 2.609e-05 |
| 2   | 3          | 19/29      | 2q22.1   | <i>LRP1B</i>    | LDL Receptor Related Protein 1B                | c.A4487G    | p.N1496S       | 0         | 1.5e-05   |
| 2   | 7          | 16/29      | 2q37.3   | <i>COL6A3</i>   | Collagen, type VI, alpha 3                     | c.A3290G    | p.Q1097R       | .-        | .-        |
| 4   | 9          | 11/29      | 4p16.3   | <i>SLC26A1</i>  | Solute Carrier Family 26 Member 1              | c.G1060A    | p.A354T        | 0         | 9.686e-05 |
| 4   | 4          | 8/29       | 4q31.3   | <i>LRBA</i>     | LPS Responsive Beige-Like Anchor Protein       | c.G3914C    | p.R1305P       | 0         | 0         |
| 7   | 3          | 15/29      | 7q21.11  | <i>HGF</i>      | Hepatocyte growth factor                       | c.C58A      | p.L20I         | 0.0003    | 0         |
| 7   | 5          | 17/29      | 7q31.33  | <i>GRM8</i>     | Glutamate Metabotropic Receptor 8              | c.C1534G    | p.P512A        | 0.0648    | 0.0001    |
| 7   | 1          | 21/29      | 7q36.1   | <i>NOS3</i>     | Nitric oxide synthase 3                        | c.C1801A    | p.Q601K        | .-        | .-        |
| 8   | 1          | 11/29      | 8p21.2   | <i>NKX2-6</i>   | NK2 Homeobox 6                                 | c.G464T     | p.R155L        | 0.0004    | 0.0001    |
| 8   | 4          | 13/29      | 8q24.12  | <i>SNTB1</i>    | Syntrophin, beta 1                             | c.G19A      | p.A7T          | 0.0278    | 0         |
| 10  | 6          | 8/29       | 10q11.23 | <i>OGDHL</i>    | Oxoglutarate dehydrogenase-like                | c.C1259T    | p.T420M        | 0         | 4.502e-05 |
| 11  | 1          | 11/29      | 11q13.3  | <i>IGHMBP2</i>  | Immunoglobulin Mu Binding Protein 2            | c.G2857A    | p.G953S        | 0.0003    | 0         |

|    |   |       |          |                |                                                                           |          |          |        |           |
|----|---|-------|----------|----------------|---------------------------------------------------------------------------|----------|----------|--------|-----------|
| 11 | 3 | 11/29 | 11q13.4  | <i>NADSYN1</i> | NAD synthetase 1                                                          | c.A612C  | p.Q204H  | 1      | 1         |
| 12 | 2 | 14/29 | 12p13.33 | <i>TULP3</i>   | Tubby Like Protein 3                                                      | c.G254T  | p.G85V   | 0-0003 | 0         |
| 12 | 1 | 9/29  | 12q13.12 | <i>WNT1</i>    | Wnt Family Member 1                                                       | c.G620A  | p.R207H  | 0      | 0         |
| 12 | 2 | 8/29  | 12q13.13 | <i>KRT76</i>   | Keratin 76                                                                | c.A803T  | p.D268V  | 0-0047 | 0         |
| 12 | 6 | 13/29 | 12q24.31 | <i>OGFOD2</i>  | 2-Oxoglutarate And Iron Dependent Oxygenase Domain<br>Containing 2        | c.A287G  | p.E96G   | 0      | 0         |
| 16 | 2 | 13/29 | 16p13.3  | <i>CACNA1H</i> | Calcium channel, voltage-dependent, T type, alpha 1H subunit              | c.G6625A | p.A2209T | .      | .         |
| 16 | 2 | 11/29 | 16q22.1  | <i>PDPFR</i>   | Pyruvate Dehydrogenase Phosphatase Regulatory Subunit                     | c.G2141A | p.R714Q  | 0      | 0         |
| 16 | 2 | 12/29 | 16q24.3  | <i>SPG7</i>    | SPG7, Paraplegin Matrix AAA Peptidase Subunit                             | c.C1067T | p.T356M  | 0      | 0         |
| 17 | 1 | 9/29  | 17p11.2  | <i>ALDH3A1</i> | Aldehyde Dehydrogenase 3 Family Member A1                                 | c.C623T  | p.T208M  | 0      | 0         |
| 17 | 3 | 16/29 | 17p11.2  | <i>KCNJ12</i>  | Potassium Voltage-Gated Channel Subfamily J Member 12                     | c.G647A  | p.G216D  | 0-0027 | 0         |
| 17 | 4 | 18/29 | 17p12    | <i>COX10</i>   | COX10, Heme A:Farnesyltransferase Cytochrome C<br>Oxidase Assembly Factor | c.T773A  | p.L258H  | 0-0047 | 0         |
| 17 | 2 | 23/29 | 17q11.2  | <i>MYO1D</i>   | Myosin ID                                                                 | c.G181T  | p.D61Y   | 0-0002 | 0         |
| 17 | 7 | 22/29 | 17q23.3  | <i>SCN4A</i>   | Sodium Voltage-Gated Channel Alpha Subunit 4                              | c.C91T   | p.R31W   | 0      | 3·129e-05 |
| 19 | 3 | 15/29 | 19p13.2  | <i>INSR</i>    | Insulin receptor                                                          | c.C5G    | p.A2G    | .-     | .-        |
| 19 | 2 | 11/29 | 19p13.3  | <i>ABCA7</i>   | ATP Binding Cassette Subfamily A Member 7                                 | c.C191T  | p.A64V   | 0-0001 | 0         |
| 20 | 1 | 16/29 | 20q13.33 | <i>GATA5</i>   | GATA Binding Protein 5                                                    | c.G640A  | p.G214S  | 0      | 0         |
| X  | 1 | 8/29  | Xq24     | <i>SLC25A5</i> | Solute Carrier Family 25 Member 5                                         | c.G361T  | p.G121C  | 0-0013 | 0-0004    |

<sup>4</sup>Exonic, nonsynonymous variants that were considered damaging according to 21 different functional scores from the annotation databases, including SIFT, LRT, MutationTaster, MutationAssessor, FATHMM, fathmm-MKL, RadialSVM, LR, PROVEAN, MetaSVM, MetaLR, CADD, GERP++, DANN, M-CAP, Eigen, GenoCanyon, Polyphen2 HVAR, Polyphen2 HDIV, PhyloP, and SiPhy, as previously reported.<sup>8</sup> Abbreviations: Max #SNPs: Maximum number of nonsynonymous variant observed among the 3 SCD groups; SNP: Single Nucleotide Polymorphism; ExAC: Exome Aggregation Consortium; AFR: African; EUR: European.

**Table S4 | Gene-specific signal of unusual difference in SNPs frequencies between Cameroun Control versus All SCA, “randomly selected”, “stroke” and “long survivor” SCD patients.**

| CHR* | Cytoband | Gene name      | P-value from Gene-specific difference in SNPs* frequencies between Cameroun controls versus |            |            |              |
|------|----------|----------------|---------------------------------------------------------------------------------------------|------------|------------|--------------|
|      |          |                | All SCA patients                                                                            | SCA random | SCA Stroke | SCA Survivor |
| 1    | 1p36.13  | <i>CLCNKB</i>  | 8.60E-06                                                                                    | 0.0177866  | 0.1132944  | 0.048514     |
| 1    | 1q23.3   | <i>RXRG</i>    | 9.70E-06                                                                                    | 0.0691087  | 0.0083722  | 0.4035179    |
| 1    | 1p36.13  | <i>CLCNKA</i>  | 1.21E-05                                                                                    | 0.0120817  | 0.1510396  | 0.0304572    |
| 11   | 11p15.4  | <i>HBG2</i>    | 1.31E-05                                                                                    | 0.0054687  | 0.4990539  | 2.32E-01     |
| 19   | 19q13.2  | <i>KCNK6</i>   | 1.32E-05                                                                                    | 0.7164672  | 5.77E-02   | 0.9          |
| 1    | 1q24.1   | <i>FAM78B</i>  | 1.42E-05                                                                                    | 0.029469   | 7.96E-02   | 0.1435747    |
| 15   | 15q24.1  | <i>ULK3</i>    | 1.59E-05                                                                                    | 0.4647865  | 0.2752014  | 1.42E-01     |
| 2    | 2q37.1   | <i>NPPC</i>    | 1.90E-05                                                                                    | 0.2936289  | 0.1522729  | 3.02E-03     |
| 17   | 17p13.2  | <i>GPIBA</i>   | 1.93E-05                                                                                    | 0.2074716  | 0.0819473  | 0.0229895    |
| 15   | 15q26.1  | <i>ASB9P1</i>  | 2.02E-05                                                                                    | 0.8608001  | 0.3276578  | 0.2107018    |
| 15   | 15q24.1  | <i>CSK</i>     | 2.49E-05                                                                                    | 0.3799891  | 0.6215994  | 1.49E-01     |
| 3    | 3p22.2   | <i>CX3CRI</i>  | 2.94E-05                                                                                    | 0.1352331  | 1.59E-01   | 0.0566138    |
| 2    | 2q12.1   | <i>FHL2</i>    | 3.21E-05                                                                                    | 0.2365149  | 0.0794517  | 0.2868306    |
| 17   | 17q21.31 | <i>WNK4</i>    | 3.40E-05                                                                                    | 0.4074042  | 7.53E-03   | 0.0944508    |
| 10   | 10q24.31 | <i>CHUK</i>    | 3.54E-05                                                                                    | 0.2827386  | 0.4938868  | 2.97E-01     |
| 7    | 7q31.2   | <i>CAVI</i>    | 3.59E-05                                                                                    | 0.0969133  | 0.0739469  | 0.0280981    |
| 11   | 11p11.2  | <i>F2</i>      | 3.72E-05                                                                                    | 0.1804408  | 0.2288114  | 0.3126277    |
| 1    | 1q24.2   | <i>SLC19A2</i> | 3.85E-05                                                                                    | 0.28671    | 0.0408285  | 0.0239266    |
| 16   | 16p13.3  | <i>DNASE1</i>  | 3.99E-05                                                                                    | 0.1121478  | 7.64E-03   | 0.1996761    |
| 9    | 9q21.32  | <i>UBQLN1</i>  | 4.16E-05                                                                                    | 0.0051538  | 6.65E-01   | 0.9          |
| 17   | 17q25.1  | <i>LLGL2</i>   | 4.56E-05                                                                                    | 0.0237748  | 4.11E-02   | 0.5014317    |
| 11   | 11p15.4  | <i>HBB</i>     | 4.57E-05                                                                                    | 0.02027    | 7.14E-02   | 0.080082     |
| 4    | 4q31.21  | <i>GYP A</i>   | 4.73E-05                                                                                    | 0.1808737  | 0.063652   | 0.5032097    |
| 11   | 11p15.1  | <i>SAAI</i>    | 4.75E-05                                                                                    | 0.054711   | 7.75E-01   | 0.2582273    |

|    |          |                 |           |           |           |           |
|----|----------|-----------------|-----------|-----------|-----------|-----------|
| 4  | 4q35.2   | <b>FII</b>      | 4.77E-05  | 0.1667932 | 0.0381918 | 0.1083799 |
| 5  | 5q15     | <b>ERAPI</b>    | 4.79E-05  | 0.0398614 | 0.0467189 | 8.73E-02  |
| 12 | 12q24.31 | <b>P2RX4</b>    | 4.99E-05  | 0.047334  | 3.17E-02  | 0.186381  |
| 8  | 8p11.21  | <b>PLAT</b>     | 0.018     | 0.157     | 1.80E-02  | 0.027     |
| 2  | 2q32.2   | <b>PMS1</b>     | 3.40E-02  | 0.074     | 0.23      | 0.864     |
| 19 | 19q13.32 | <b>APOE</b>     | 6.15E-02  | 0.1367854 | 0.5361577 | 3.32E-05  |
| 16 | 16p13.11 | <b>NTANI</b>    | 6.47E-02  | 0.1190184 | 0.8327524 | 1.08E-05  |
| 9  | 9q34.3   | <b>FUT7</b>     | 6.85E-02  | 0.0144899 | 0.0527418 | 1.14E-05  |
| 17 | 17p13.2  | <b>CTNS</b>     | 0.0808225 | 0.2485278 | 4.10E-05  | 2.49E-01  |
| 1  | 1q24.2   | <b>F5</b>       | 9.47E-02  | 0.411426  | 0.1042254 | 4.33E-05  |
| 1  | 1q31.3   | <b>CFH</b>      | 0.1126248 | 0.1202527 | 3.65E-05  | 0.2054329 |
| 20 | 20p13    | <b>PRNP</b>     | 0.1182381 | 0.2255724 | 0.3606476 | 4.19E-05  |
| 11 | 11q13.4  | <b>P2RY2</b>    | 1.36E-01  | 0.4513712 | 0.0314428 | 4.39E-05  |
| 5  | 5q31.3   | <b>NR3C1</b>    | 1.46E-01  | 0.5880721 | 4.89E-05  | 0.2001723 |
| 16 | 16q23.1  | <b>MON1B</b>    | 1.48E-01  | 0.2350079 | 0.3612341 | 4.89E-05  |
| 5  | 5q23.1   | <b>SEMA6A</b>   | 0.1506902 | 0.0952938 | 4.35E-05  | 3.62E-01  |
| 17 | 17q21.2  | <b>CNP</b>      | 0.1588079 | 0.4227699 | 0.5361959 | 4.71E-05  |
| 1  | 1p34.2   | <b>EDN2</b>     | 1.67E-01  | 0.4813942 | 4.58E-05  | 0.5188978 |
| 1  | 1q25.1   | <b>SERPINC1</b> | 1.72E-01  | 0.2501583 | 0.9       | 4.75E-05  |
| 22 | 22q11.23 | <b>ADORA2A</b>  | 0.1834713 | 0.6887537 | 0.5334695 | 4.82E-05  |
| 1  | 1p35.2   | <b>FABP3</b>    | 0.1836854 | 0.3136781 | 7.78E-01  | 4.04E-05  |
| 14 | 14q22.2  | <b>GCH1</b>     | 0.2018993 | 0.3364537 | 0.6292693 | 4.15E-05  |
| 5  | 5q31.1   | <b>IL4</b>      | 0.2282411 | 0.1718836 | 4.66E-05  | 0.9       |
| 3  | 3q25.33  | <b>IL12A</b>    | 0.2372261 | 0.3222783 | 3.74E-05  | 4.72E-01  |
| 5  | 5q31.1   | <b>IL13</b>     | 0.245173  | 0.1548332 | 2.49E-05  | 9.00E-01  |
| 12 | 12p13.31 | <b>GNB3</b>     | 0.2529551 | 0.7882165 | 3.57E-05  | 0.5258433 |
| 22 | 22q11.23 | <b>GSTT1</b>    | 0.2960057 | 0.2141566 | 1.40E-06  | 0.4283995 |
| 19 | 19q13.2  | <b>SPTBN4</b>   | 0.3233646 | 0.9       | 3.54E-05  | 0.3603377 |
| 6  | 6q14.2   | <b>PRSS35</b>   | 0.3480714 | 0.2432587 | 4.30E-06  | 0.1925617 |
| 9  | 9q22.31  | <b>ROR2</b>     | 0.388616  | 0.434711  | 4.64E-05  | 0.6851996 |
| 2  | 2p25.1   | <b>HPCAL1</b>   | 0.4900588 | 0.8756077 | 0.4823774 | 3.76E-05  |

|    |          |                |            |           |           |           |
|----|----------|----------------|------------|-----------|-----------|-----------|
| 7  | 7q21.11  | <b>HGF</b>     | 0.00498    | 0.9       | 0.0236    | 0.0391    |
| 1  | 1q23.3   | <b>FCGR2A</b>  | 0.05173812 | 0.9       | 0.4546349 | 1.77E-05  |
| 3  | 3p21.31  | <b>CCR3</b>    | 0.527461   | 0.8870905 | 0.729255  | 3.24E-05  |
| 16 | 16p13.3  | <b>CACNAIH</b> | 0.00185    | 0.0748    | 0.0558    | 0.0521    |
| 2  | 2q32.1   | <b>CALCRL</b>  | 0.7161659  | 0.5468703 | 2.35E-05  | 0.9       |
| 17 | 17q21.31 | <b>WNT3</b>    | 0.7387889  | 0.1083799 | 3.45E-05  | 0.4606751 |
| 7  | 7q36.3   | <b>VIPR2</b>   | 0.8171543  | 0.6129953 | 4.30E-05  | 0.2421205 |
| 9  | 9p13.3   | <b>NPR2</b>    | 0.8628314  | 0.2551507 | 6.90E-06  | 0.4430517 |
| 11 | 11q13.4  | <b>NADSYN1</b> | 0.009      | 0.0374    | 0.04      | 0.0245    |

\*Abbreviations: CHR: chromosome; SNPs: Single Nucleotide Polymorphism.

**Table S5. Details of mutations identified within genes (Table S1) in SCA patients from Cameroon**

| #CHROM   | POS              | SNP                   | A1/A2         | avsnp147              | Gene.refGene | cDNA_Change    | Protein Change                | AChange.refGene             | Siphy Score  |
|----------|------------------|-----------------------|---------------|-----------------------|--------------|----------------|-------------------------------|-----------------------------|--------------|
| <b>1</b> | <b>11876692</b>  | <b>rs57044879</b>     | <b>G/A</b>    | <b>rs57044879</b>     | <b>CLCN6</b> | <b>1p36.22</b> | <b>exon4:c.G234A</b>          | <b>exon4:p.A78A</b>         | <b>16.37</b> |
| 1        | 11884586         | rs60602304            | G/A           | rs60602304            | CLCN6        | 1p36.22        | exon8:c.G624A                 | exon8:p.S208S               | 13.18        |
| 1        | 11888618         | chr1:11888618         | G/C           | chr1:11888618         | CLCN6        | 1p36.22        | exon12:c.G1058C               | exon12:p.C353S              | 13.99        |
| 1        | 11894062         | rs147341529           | C/T           | rs147341529           | CLCN6        | 1p36.22        | exon15:c.C1501T               | exon15:p.R501C              | 13.20        |
| 1        | 11897409         | chr1:11897409         | C/A           | chr1:11897409         | CLCN6        | 1p36.22        | exon20:c.C2148A               | exon20:p.P716P              | 13.01        |
| <b>1</b> | <b>165386410</b> | <b>chr1:165386410</b> | <b>TGAA/T</b> | <b>chr1:165386410</b> | <b>RXRG</b>  | <b>1q23.3</b>  | <b>exon5:c.118_120del</b>     | <b>exon5:p.40_40del</b>     | <b>13.82</b> |
| 1        | 169505792        | rs116809837           | G/A           | rs116809837           | F5           | 1q24.2         | exon14:c.C4923T               | exon14:p.L1641L             | 13.13        |
| 1        | 169510118        | rs9332608             | G/A           | rs9332608             | F5           | 1q24.2         | exon13:c.C4210T               | exon13:p.P1404S             | 13.24        |
| 1        | 169510233        | rs9332607             | G/A           | rs9332607             | F5           | 1q24.2         | exon13:c.C4095T               | exon13:p.T1365T             | 13.24        |
| 1        | 169510380        | rs9287090             | G/A           | rs9287090             | F5           | 1q24.2         | exon13:c.C3948T               | exon13:p.L1316L             | 12.92        |
| 1        | 169510475        | rs1046712             | G/T           | rs1046712             | F5           | 1q24.2         | exon13:c.C3853A               | exon13:p.L1285I             | 12.22        |
| 1        | 169510524        | rs1800594             | A/G           | rs1800594             | F5           | 1q24.2         | exon13:c.T3804C               | exon13:p.S1268S             | 12.21        |
| 1        | 169510890        | rs6005                | G/C           | rs6005                | F5           | 1q24.2         | exon13:c.C3438G               | exon13:p.H1146Q             | 12.29        |
| 1        | 169511166        | rs149026031           | T/G           | rs149026031           | F5           | 1q24.2         | exon13:c.A3162C               | exon13:p.E1054D             | 12.15        |
| 1        | 169511389        | rs9332605             | C/A           | rs9332605             | F5           | 1q24.2         | exon13:c.G2939T               | exon13:p.R980L              | 12.16        |
| 1        | 169511445        | rs144026312           | A/G           | rs144026312           | F5           | 1q24.2         | exon13:c.T2883C               | exon13:p.D961D              | 12.32        |
| 1        | 169511903        | rs6031                | G/A           | rs6031                | F5           | 1q24.2         | exon13:c.C2425T               | exon13:p.P809S              | 12.34        |
| <b>1</b> | <b>169512078</b> | <b>rs377011882</b>    | <b>CTCT/C</b> | <b>rs377011882</b>    | <b>F5</b>    | <b>1q24.2</b>  | <b>exon13:c.2247_2249 del</b> | <b>exon13:p.749_750 del</b> | <b>18.04</b> |
| 1        | 169512093        | rs6017                | A/G           | rs6017                | F5           | 1q24.2         | exon13:c.T2235C               | exon13:p.N745N              | 12.35        |
| 1        | 169512120        | rs6016                | G/A           | rs6016                | F5           | 1q24.2         | exon13:c.C2208T               | exon13:p.I736I              | 13.46        |

|          |                  |                       |               |                       |                        |               |                           |                           |              |
|----------|------------------|-----------------------|---------------|-----------------------|------------------------|---------------|---------------------------|---------------------------|--------------|
| 1        | 169512199        | rs115954845           | T/C           | rs115954845           | <i>F5</i>              | 1q24.2        | exon13:c.A2129G           | exon13:p.H710R            | 14.07        |
| 1        | 169512223        | rs78958618            | G/A           | rs78958618            | <i>F5</i>              | 1q24.2        | exon13:c.C2105T           | exon13:p.T702I            | 13.38        |
| 1        | 169526020        | rs9332578             | G/A           | rs9332578             | <i>F5</i>              | 1q24.2        | exon6:c.C816T             | exon6:p.N272N             | 15.29        |
| 1        | 169529826        | rs6022                | A/C           | rs6022                | <i>F5</i>              | 1q24.2        | exon4:c.G552G             | exon4:p.S184S             | 12.40        |
| 1        | 169529973        | rs6029                | T/C           | rs6029                | <i>F5</i>              | 1q24.2        | exon4:c.G405G             | exon4:p.A135A             | 14.01        |
| 1        | 171605081        | rs145977437           | T/C           | rs145977437           | <i>MYOC</i>            | 1q24.3        | exon3:c.A1499G            | exon3:p.K500R             | 12.42        |
| 1        | 171605392        | rs61730975            | C/T           | rs61730975            | <i>MYOC</i>            | 1q24.3        | exon3:c.G1188A            | exon3:p.E396E             | 16.00        |
| 1        | 171605526        | rs61745146            | C/T           | rs61745146            | <i>MYOC</i>            | 1q24.3        | exon3:c.G1054A            | exon3:p.E352K             | 12.44        |
| 1        | 171605595        | rs146391864           | C/.           | rs146391864           | <i>MYOC</i>            | 1q24.3        | exon3:c.G985G             | exon3:p.V329V             | 12.85        |
| 1        | 171605605        | rs61730976            | C/T           | rs61730976            | <i>MYOC</i>            | 1q24.3        | exon3:c.G975A             | exon3:p.T325T             | 12.76        |
| 1        | 171621191        | chr1:171621191        | C/A           | chr1:171621191        | <i>MYOC</i>            | 1q24.3        | exon1:c.G561T             | exon1:p.Q187H             | 13.47        |
| <b>1</b> | <b>171621196</b> | <b>chr1:171621196</b> | <b>GACA/G</b> | <b>chr1:171621196</b> | <b><i>MYOC</i></b>     | <b>1q24.3</b> | <b>exon1:c.553_555del</b> | <b>exon1:p.185_185del</b> | <b>16.18</b> |
| 1        | 171621275        | rs61730977            | T/C           | rs61730977            | <i>MYOC</i>            | 1q24.3        | exon1:c.A477G             | exon1:p.L159L             | 14.49        |
| 1        | 171621713        | rs12082573            | A/C           | rs12082573            | <i>MYOC</i>            | 1q24.3        | exon1:c.T39G              | exon1:p.P13P              | 13.85        |
| <b>1</b> | <b>173878832</b> | <b>rs5878</b>         | <b>C/T</b>    | <b>rs5878</b>         | <b><i>SERPINC1</i></b> | <b>1q25.1</b> | <b>exon5:c.A1011A</b>     | <b>exon5:p.Q337Q</b>      | <b>15.11</b> |
| 1        | 173878862        | rs5877                | C/T           | rs5877                | <i>SERPINC1</i>        | 1q25.1        | exon5:c.A981A             | exon5:p.V327V             | 13.92        |
| 1        | 173878985        | rs139463995           | C/G           | rs139463995           | <i>SERPINC1</i>        | 1q25.1        | exon5:c.G858C             | exon5:p.Q286H             | 14.53        |
| 1        | 173881122        | rs2227606             | T/C           | rs2227606             | <i>SERPINC1</i>        | 1q25.1        | exon3:c.A439G             | exon3:p.T147A             | 14.04        |
| 1        | 173883886        | chr1:173883886        | C/A           | chr1:173883886        | <i>SERPINC1</i>        | 1q25.1        | exon2:c.G213T             | exon2:p.K71N              | 15.05        |
| <b>1</b> | <b>203652444</b> | <b>rs1419114</b>      | <b>G/A</b>    | <b>rs1419114</b>      | <b><i>ATP2B4</i></b>   | <b>1q32.1</b> | <b>exon2:c.A111A</b>      | <b>exon2:p.S37S</b>       | <b>15.86</b> |
| 1        | 203667409        | rs2228445             | C/T           | rs2228445             | <i>ATP2B4</i>          | 1q32.1        | exon3:c.T318T             | exon3:p.L106L             | 13.57        |
| 1        | 203672867        | rs145963279           | T/C           | rs145963279           | <i>ATP2B4</i>          | 1q32.1        | exon8:c.T1025C            | exon8:p.V342A             | 12.58        |
| 1        | 203676326        | chr1:203676326        | C/A           | chr1:203676326        | <i>ATP2B4</i>          | 1q32.1        | exon9:c.C1289A            | exon9:p.T430N             | 14.59        |
| 1        | 203676332        | chr1:203676332        | C/A           | chr1:203676332        | <i>ATP2B4</i>          | 1q32.1        | exon9:c.C1295A            | exon9:p.S432X             | 12.60        |
| 1        | 203677220        | rs114362667           | C/T           | rs114362667           | <i>ATP2B4</i>          | 1q32.1        | exon10:c.C1545T           | exon10:p.T515T            | 14.01        |

|          |                  |                    |            |                    |                      |               |                           |                         |              |
|----------|------------------|--------------------|------------|--------------------|----------------------|---------------|---------------------------|-------------------------|--------------|
| 1        | 203678536        | rs74402274         | T/C        | rs74402274         | <i>ATP2B4</i>        | 1q32.1        | exon11:c.T1665C           | exon11:p.N555N          | 13.62        |
| 1        | 203680173        | rs75360548         | T/C        | rs75360548         | <i>ATP2B4</i>        | 1q32.1        | exon12:c.T1968C           | exon12:p.N656N          | 12.03        |
| 1        | 203681255        | rs2229565          | C/T        | rs2229565          | <i>ATP2B4</i>        | 1q32.1        | exon13:c.C2199T           | exon13:p.N733N          | 12.24        |
| <b>2</b> | <b>30957326</b>  | <b>rs2276568</b>   | <b>A/G</b> | <b>rs2276568</b>   | <b><i>CAPN13</i></b> | <b>2p23.1</b> | <b>exon19:c.T1787C</b>    | <b>exon19:p.I596T</b>   | <b>15.65</b> |
| 2        | 30964792         | rs75691612         | G/C        | rs75691612         | <i>CAPN13</i>        | 2p23.1        | exon15:c.C1518G           | exon15:p.F506L          | 12.66        |
| 2        | 30966387         | rs113891539        | C/A        | rs113891539        | <i>CAPN13</i>        | 2p23.1        | exon13:c.G1307T           | exon13:p.S436I          | 13.67        |
| 2        | 31000437         | rs150868423        | G/A        | rs150868423        | <i>CAPN13</i>        | 2p23.1        | exon3:c.C267T             | exon3:p.G89G            | 12.68        |
| 2        | 74454158         | rs146665416        | G/C        | rs146665416        | <i>SLC4A5</i>        | 2p13.1        | exon27:c.C3016G           | exon27:p.L1006V         | 12.09        |
| <b>2</b> | <b>74458420</b>  | <b>rs114300772</b> | <b>A/A</b> | <b>rs114300772</b> | <b><i>SLC4A5</i></b> | <b>2p13.1</b> | <b>exon25:c.C2790T</b>    | <b>exon25:p.T930T</b>   | <b>20.28</b> |
| 2        | 74460685         | rs3796109          | C/T        | rs3796109          | <i>SLC4A5</i>        | 2p13.1        | exon23:c.G2439A           | exon23:p.T813T          | 14.71        |
| 2        | 74466594         | rs4853018          | G/A        | rs4853018          | <i>SLC4A5</i>        | 2p13.1        | exon21:c.C2187T           | exon21:p.G729G          | 12.02        |
| 2        | 74479413         | chr2:74479413      | GCCA/G     | rs764953142        | <i>SLC4A5</i>        | 2p13.1        | exon16:c.1368_1370<br>del | exon16:p.456_457<br>del | 14.73        |
| 2        | 74489323         | rs17009792         | C/T        | rs17009792         | <i>SLC4A5</i>        | 2p13.1        | exon11:c.G752A            | exon11:p.S251N          | 12.74        |
| 2        | 74492388         | chr2:74492388      | C/A        | chr2:74492388      | <i>SLC4A5</i>        | 2p13.1        | exon9:c.G405T             | exon9:p.W135C           | 17.75        |
| <b>2</b> | <b>128331604</b> | <b>rs193069171</b> | <b>A/G</b> | <b>rs193069171</b> | <b><i>MYO7B</i></b>  | <b>2q14.3</b> | <b>exon7:c.A702G</b>      | <b>exon7:p.Q234Q</b>    | <b>14.66</b> |
| 2        | 128351163        | rs147949489        | G/A        | rs147949489        | <i>MYO7B</i>         | 2q14.3        | exon18:c.G2188A           | exon18:p.V730M          | 12.77        |
| 2        | 128351183        | rs115592021        | A/C        | rs115592021        | <i>MYO7B</i>         | 2q14.3        | exon18:c.A2208C           | exon18:p.K736N          | 12.78        |
| 2        | 128364873        | rs199821381        | G/A        | rs199821381        | <i>MYO7B</i>         | 2q14.3        | exon21:c.G2517A           | exon21:p.L839L          | 13.79        |
| 2        | 128367092        | rs777432           | G/A        | rs777432           | <i>MYO7B</i>         | 2q14.3        | exon23:c.G2826A           | exon23:p.S942S          | 13.02        |
| 2        | 128367144        | rs200386846        | G/A        | rs200386846        | <i>MYO7B</i>         | 2q14.3        | exon23:c.G2878A           | exon23:p.E960K          | 12.81        |
| 2        | 128367433        | rs61741454         | G/A        | rs61741454         | <i>MYO7B</i>         | 2q14.3        | exon24:c.G3034A           | exon24:p.V1012I         | 12.85        |
| 2        | 128381717        | rs2245408          | G/A        | rs2245408          | <i>MYO7B</i>         | 2q14.3        | exon29:c.G3791A           | exon29:p.R1264Q         | 12.53        |
| 2        | 128381773        | rs116176015        | A/G        | rs116176015        | <i>MYO7B</i>         | 2q14.3        | exon29:c.A3847G           | exon29:p.I1283V         | 12.84        |
| 2        | 128381808        | rs13422424         | C/T        | rs13422424         | <i>MYO7B</i>         | 2q14.3        | exon29:c.C3882T           | exon29:p.H1294H         | 12.80        |
| 2        | 128381861        | rs61743523         | G/A        | rs61743523         | <i>MYO7B</i>         | 2q14.3        | exon29:c.G3935A           | exon29:p.R1312Q         | 12.96        |



|          |                  |                   |            |                   |                    |               |                        |                       |              |
|----------|------------------|-------------------|------------|-------------------|--------------------|---------------|------------------------|-----------------------|--------------|
| 2        | 128381889        | rs61745600        | C/T        | rs61745600        | <i>MYO7B</i>       | 2q14.3        | exon29:c.C3963T        | exon29:p.F1321F       | 12.87        |
| 2        | 128385982        | rs147310604       | C/T        | rs147310604       | <i>MYO7B</i>       | 2q14.3        | exon33:c.C4418T        | exon33:p.T1473M       | 13.08        |
| 2        | 128386040        | rs376979966       | G/A        | rs376979966       | <i>MYO7B</i>       | 2q14.3        | exon33:c.G4476A        | exon33:p.V1492V       | 12.89        |
| 2        | 128388790        | rs13025791        | G/A        | rs13025791        | <i>MYO7B</i>       | 2q14.3        | exon36:c.G4869A        | exon36:p.E1623E       | 12.80        |
| 2        | 128388794        | rs142758251       | G/A        | rs142758251       | <i>MYO7B</i>       | 2q14.3        | exon36:c.G4873A        | exon36:p.D1625N       | 12.91        |
| 2        | 128388862        | rs13025959        | G/C        | rs13025959        | <i>MYO7B</i>       | 2q14.3        | exon36:c.G4941C        | exon36:p.E1647D       | 12.90        |
| 2        | 128388902        | rs201972665       | G/A        | rs201972665       | <i>MYO7B</i>       | 2q14.3        | exon36:c.G4981A        | exon36:p.V1661I       | 12.93        |
| 2        | 128388919        | chr2:128388919    | C/A        | chr2:128388919    | <i>MYO7B</i>       | 2q14.3        | exon36:c.C4998A        | exon36:p.I1666I       | 12.74        |
| 2        | 128389939        | chr2:128389939    | GC/.       | rs746320826       | <i>MYO7B</i>       | 2q14.3        | exon38:c.5291delC      | exon38:p.A1764fs      | 12.65        |
| 2        | 128389950        | chr2:128389950    | CAG/.      | chr2:128389950    | <i>MYO7B</i>       | 2q14.3        | exon38:c.5303delG      | exon38:p.S1768fs      | 12.96        |
| 2        | 128390878        | rs187045307       | C/T        | rs187045307       | <i>MYO7B</i>       | 2q14.3        | exon39:c.C5373T        | exon39:p.A1791A       | 12.77        |
| 2        | 128390935        | rs146807651       | T/C        | rs146807651       | <i>MYO7B</i>       | 2q14.3        | exon39:c.T5430C        | exon39:p.S1810S       | 12.88        |
| 2        | 128392173        | rs61738660        | C/T        | rs61738660        | <i>MYO7B</i>       | 2q14.3        | exon41:c.C5550T        | exon41:p.V1850V       | 12.99        |
| 2        | 128393359        | rs150007517       | G/A        | rs150007517       | <i>MYO7B</i>       | 2q14.3        | exon43:c.G5805A        | exon43:p.A1935A       | 12.60        |
| 2        | 128394955        | rs11686946        | A/G        | rs11686946        | <i>MYO7B</i>       | 2q14.3        | exon47:c.A6314G        | exon47:p.Q2105R       | 12.70        |
| <b>2</b> | <b>190660503</b> | <b>rs5742980</b>  | <b>T/C</b> | <b>rs5742980</b>  | <b><i>PMS1</i></b> | <b>2q32.2</b> | <b>exon4:c.T141C</b>   | <b>exon4:p.Y47Y</b>   | <b>20.02</b> |
| 2        | 190670407        | rs2066457         | T/C        | rs2066457         | <i>PMS1</i>        | 2q32.2        | exon5:c.T345C          | exon5:p.D115D         | 14.98        |
| 2        | 190671168        | chr2:190671168    | G/A        | chr2:190671168    | <i>PMS1</i>        | 2q32.2        | exon5:c.G438A          | exon5:p.Q146Q         | 13.10        |
| 2        | 190719742        | rs74512161        | G/A        | rs74512161        | <i>PMS1</i>        | 2q32.2        | exon10:c.G1744A        | exon10:p.V582I        | 13.10        |
| 2        | 190728779        | rs61736573        | G/A        | rs61736573        | <i>PMS1</i>        | 2q32.2        | exon11:c.G2167A        | exon11:p.E723K        | 14.89        |
| 2        | 190732599        | rs55859858        | C/G        | rs55859858        | <i>PMS1</i>        | 2q32.2        | exon12:c.C2417G        | exon12:p.T806S        | 15.07        |
| 2        | 190742119        | rs147566508       | G/A        | rs147566508       | <i>PMS1</i>        | 2q32.2        | exon14:c.G2756A        | exon14:p.R919H        | 14.08        |
| 2        | 211421452        | rs3835047         | ATCT/A     | rs3835047         | <i>CPS1</i>        | 2q34          | exon2:c.14_16del       | exon2:p.5_6del        | 15.10        |
| 2        | 211456639        | rs2229589         | T/C        | rs2229589         | <i>CPS1</i>        | 2q34          | exon11:c.C1050C        | exon11:p.T350T        | 12.54        |
| <b>2</b> | <b>211456675</b> | <b>rs34022862</b> | <b>G/G</b> | <b>rs34022862</b> | <b><i>CPS1</i></b> | <b>2q34</b>   | <b>exon11:c.C1086G</b> | <b>exon11:p.V362V</b> | <b>19.27</b> |
| 2        | 211473157        | rs41272667        | C/T        | rs41272667        | <i>CPS1</i>        | 2q34          | exon20:c.C2283T        | exon20:p.S761S        | 14.11        |

|          |                  |                   |            |                   |                      |                |                       |                       |              |
|----------|------------------|-------------------|------------|-------------------|----------------------|----------------|-----------------------|-----------------------|--------------|
| 2        | 211476843        | rs35678745        | C/A        | rs35678745        | <i>CPS1</i>          | 2q34           | exon21:c.C2412A       | exon21:p.V804V        | 13.13        |
| 2        | 211481257        | rs2287599         | G/C        | rs2287599         | <i>CPS1</i>          | 2q34           | exon22:c.C2697C       | exon22:p.G899G        | 15.14        |
| 2        | 211507277        | rs79627159        | C/T        | rs79627159        | <i>CPS1</i>          | 2q34           | exon26:c.C3047T       | exon26:p.T1016M       | 14.12        |
| 2        | 211507281        | rs35374255        | G/C        | rs35374255        | <i>CPS1</i>          | 2q34           | exon26:c.G3051C       | exon26:p.V1017V       | 13.16        |
| 2        | 211513215        | rs76340296        | G/A        | rs76340296        | <i>CPS1</i>          | 2q34           | exon28:c.G3373A       | exon28:p.A1125T       | 15.17        |
| 2        | 211540507        | rs1047891         | C/A        | rs1047891         | <i>CPS1</i>          | 2q34           | exon37:c.C4235A       | exon37:p.T1412N       | 12.18        |
| 2        | 211540550        | rs138395129       | C/G        | rs138395129       | <i>CPS1</i>          | 2q34           | exon37:c.C4278G       | exon37:p.L1426L       | 14.19        |
| <b>2</b> | <b>238283288</b> | <b>rs36062562</b> | <b>C/T</b> | <b>rs36062562</b> | <b><i>COL6A3</i></b> | <b>2q37.3</b>  | <b>exon8:c.G3446A</b> | <b>exon8:p.R1149Q</b> | <b>14.20</b> |
| 2        | 238283544        | rs369810455       | G/A        | rs369810455       | <i>COL6A3</i>        | 2q37.3         | exon8:c.C3190T        | exon8:p.R1064W        | 12.31        |
| 2        | 238285431        | rs34367758        | G/A        | rs34367758        | <i>COL6A3</i>        | 2q37.3         | exon7:c.C3054T        | exon7:p.N1018N        | 13.12        |
| 2        | 238287800        | rs36092870        | C/T        | rs36092870        | <i>COL6A3</i>        | 2q37.3         | exon6:c.G1976A        | exon6:p.R659H         | 13.12        |
| 2        | 238289664        | rs76576170        | G/A        | rs76576170        | <i>COL6A3</i>        | 2q37.3         | exon5:c.C1791T        | exon5:p.F597F         | 13.12        |
| 2        | 238289669        | rs34934127        | C/A        | rs34934127        | <i>COL6A3</i>        | 2q37.3         | exon5:c.G1786T        | exon5:p.A596S         | 12.15        |
| 2        | 238289817        | rs112040282       | G/A        | rs112040282       | <i>COL6A3</i>        | 2q37.3         | exon5:c.C1638T        | exon5:p.A546A         | 12.26        |
| 2        | 238296323        | rs114549120       | A/G        | rs114549120       | <i>COL6A3</i>        | 2q37.3         | exon4:c.T1214C        | exon4:p.F405S         | 12.47        |
| 2        | 238296655        | rs7561625         | G/A        | rs7561625         | <i>COL6A3</i>        | 2q37.3         | exon4:c.C882T         | exon4:p.F294F         | 12.28        |
| 4        | 187195373        | rs5973            | C/T        | rs5973            | <i>F11</i>           | 4q35.2         | exon5:c.C429T         | exon5:p.D143D         | 12.29        |
| <b>4</b> | <b>187195397</b> | <b>rs34807019</b> | <b>C/T</b> | <b>rs34807019</b> | <b><i>F11</i></b>    | <b>4q35.2</b>  | <b>exon5:c.C453T</b>  | <b>exon5:p.Y151Y</b>  | <b>15.30</b> |
| 4        | 187201211        | rs5974            | A/G        | rs5974            | <i>F11</i>           | 4q35.2         | exon8:c.A801G         | exon8:p.T267T         | 12.31        |
| 4        | 187205301        | rs5970            | T/C        | rs5970            | <i>F11</i>           | 4q35.2         | exon11:c.T1191C       | exon11:p.G397G        | 12.42        |
| 4        | 187208968        | rs5975            | C/T        | rs5975            | <i>F11</i>           | 4q35.2         | exon14:c.C1707T       | exon14:p.D569D        | 12.33        |
| 4        | 187209702        | rs5971            | G/T        | rs5971            | <i>F11</i>           | 4q35.2         | exon15:c.G1812T       | exon15:p.R604R        | 13.04        |
| 4        | 187209729        | rs5976            | G/A        | rs5976            | <i>F11</i>           | 4q35.2         | exon15:c.G1839A       | exon15:p.E613E        | 12.35        |
| <b>5</b> | <b>7870973</b>   | <b>rs1801394</b>  | <b>A/G</b> | <b>rs1801394</b>  | <b><i>MTRR</i></b>   | <b>5p15.31</b> | <b>exon2:c.A147G</b>  | <b>exon2:p.I49M</b>   | <b>15.16</b> |
| 5        | 7873500          | rs138612190       | C/T        | rs138612190       | <i>MTRR</i>          | 5p15.31        | exon3:c.C225T         | exon3:p.T75T          | 12.37        |
| 5        | 70888760         | rs144578800       | A/G        | rs144578800       | <i>MCCC2</i>         | 5q13.2         | exon2:c.A137G         | exon2:p.Y46C          | 13.08        |

|          |                  |                       |                |                       |                |                |                        |                        |              |
|----------|------------------|-----------------------|----------------|-----------------------|----------------|----------------|------------------------|------------------------|--------------|
| 5        | <b>70931043</b>  | <b>rs112793062</b>    | <b>T/C</b>     | <b>rs112793062</b>    | <b>MCCC2</b>   | <b>5q13.2</b>  | <b>exon10:c.T969C</b>  | <b>exon10:p.A323A</b>  | <b>17.39</b> |
| 5        | 70945075         | rs10064079            | G/A            | rs10064079            | MCCC2          | 5q13.2         | exon14:c.A1368A        | exon14:p.A456A         | 15.14        |
| 5        | 131705723        | rs144020613           | T/A            | rs144020613           | SLC22A5        | 5q31.1         | exon1:c.T59A           | exon1:p.L20H           | 12.14        |
| <b>5</b> | <b>131705941</b> | <b>chr5:131705941</b> | <b>TCGG/. </b> | <b>chr5:131705941</b> | <b>SLC22A5</b> | <b>5q31.1</b>  | <b>exon1:c.280delG</b> | <b>exon1:p.A94fs</b>   | <b>18.12</b> |
| 5        | 131705949        | rs2631365             | T/C            | rs2631365             | SLC22A5        | 5q31.1         | exon1:c.T285C          | exon1:p.L95L           | 12.43        |
| 5        | 131721174        | rs274558              | A/G            | rs274558              | SLC22A5        | 5q31.1         | exon5:c.A879G          | exon5:p.L293L          | 13.44        |
| 5        | 131726578        | rs139775414           | A/G            | rs139775414           | SLC22A5        | 5q31.1         | exon8:c.A1321G         | exon8:p.M441V          | 12.14        |
| 5        | 131728225        | rs142355575           | A/G            | rs142355575           | SLC22A5        | 5q31.1         | exon9:c.A1440G         | exon9:p.T480T          | 12.46        |
| 5        | 131729880        | rs148233131           | G/T            | rs148233131           | SLC22A5        | 5q31.1         | exon11:c.G1662T        | exon11:p.M554I         | 13.07        |
| 5        | 131729935        | rs11568525            | C/T            | rs11568525            | SLC22A5        | 5q31.1         | exon11:c.C1717T        | exon11:p.P573S         | 14.48        |
| 6        | 7727271          | rs111588693           | G/A            | rs111588693           | BMP6           | 6p24.3         | exon1:c.G83A           | exon1:p.R28Q           | 16.09        |
| 6        | 7727546          | chr6:7727546          | C/A            | chr6:7727546          | BMP6           | 6p24.3         | exon1:c.C358A          | exon1:p.P120T          | 12.50        |
| 6        | 7727590          | chr6:7727590          | C/A            | chr6:7727590          | BMP6           | 6p24.3         | exon1:c.C402A          | exon1:p.L134L          | 12.56        |
| <b>6</b> | <b>7727753</b>   | <b>chr6:7727753</b>   | <b>GC/. </b>   | <b>chr6:7727753</b>   | <b>BMP6</b>    | <b>6p24.3</b>  | <b>exon1:c.566delC</b> | <b>exon1:p.A189fs</b>  | <b>16.72</b> |
| 6        | 7727824          | rs199789965           | G/.            | rs199789965           | BMP6           | 6p24.3         | exon1:c.G636G          | exon1:p.A212A          | 12.15        |
| 6        | 7727849          | chr6:7727849          | C/.            | chr6:7727849          | BMP6           | 6p24.3         | exon1:c.C661C          | exon1:p.L221L          | 12.34        |
| 6        | 7845478          | rs148916269           | G/A            | rs148916269           | BMP6           | 6p24.3         | exon2:c.G770A          | exon2:p.R257H          | 12.55        |
| 6        | 7862541          | rs61733612            | C/T            | rs61733612            | BMP6           | 6p24.3         | exon4:c.C1014T         | exon4:p.H338H          | 12.86        |
| 6        | 7862589          | rs17558               | C/T            | rs17558               | BMP6           | 6p24.3         | exon4:c.C1062T         | exon4:p.D354D          | 12.67        |
| 6        | 7862631          | rs17557               | C/G            | rs17557               | BMP6           | 6p24.3         | exon4:c.G1104G         | exon4:p.V368V          | 12.58        |
| 6        | 7880291          | rs150397946           | A/.            | rs150397946           | BMP6           | 6p24.3         | exon6:c.A1349A         | exon6:p.N450N          | 12.99        |
| 6        | 7880326          | chr6:7880326          | C/A            | chr6:7880326          | BMP6           | 6p24.3         | exon6:c.C1384A         | exon6:p.Q462K          | 12.16        |
| 6        | 7880519          | rs149391648           | C/G            | rs149391648           | BMP6           | 6p24.3         | exon7:c.C1485G         | exon7:p.S495S          | 12.78        |
| <b>6</b> | <b>133004281</b> | <b>rs61729583</b>     | <b>A/G</b>     | <b>rs61729583</b>     | <b>VNN1</b>    | <b>6q23.2</b>  | <b>exon7:c.T1540C</b>  | <b>exon7:p.X514Q</b>   | <b>15.12</b> |
| <b>7</b> | <b>81374351</b>  | <b>rs5745666</b>      | <b>A/G</b>     | <b>rs5745666</b>      | <b>HGF</b>     | <b>7q21.11</b> | <b>exon6:c.T696C</b>   | <b>exon6:p.H232H</b>   | <b>14.93</b> |
| <b>7</b> | <b>87133606</b>  | <b>chr7:87133606</b>  | <b>T/C</b>     | <b>chr7:87133606</b>  | <b>ABCB1</b>   | <b>7q21.12</b> | <b>exon32:c.A4006G</b> | <b>exon32:p.I1336V</b> | <b>15.64</b> |

|          |                  |                       |                        |                       |                        |                |                           |                       |              |
|----------|------------------|-----------------------|------------------------|-----------------------|------------------------|----------------|---------------------------|-----------------------|--------------|
| 7        | 87138645         | rs1045642             | G/A                    | rs1045642             | <i>ABCB1</i>           | 7q21.12        | exon30:c.T3645T           | exon30:p.I1215I       | 12.16        |
| 7        | 87138659         | rs2229107             | A/T                    | rs2229107             | <i>ABCB1</i>           | 7q21.12        | exon30:c.T3631A           | exon30:p.S1211T       | 12.66        |
| 7        | 87144678         | rs28401798            | G/C                    | rs28401798            | <i>ABCB1</i>           | 7q21.12        | exon29:c.C3361G           | exon29:p.P1121A       | 13.67        |
| 7        | 87174198         | rs35023033            | G/A                    | rs35023033            | <i>ABCB1</i>           | 7q21.12        | exon20:c.C2215T           | exon20:p.R739C        | 12.98        |
| 7        | 87179601         | rs1128503             | G/A                    | rs1128503             | <i>ABCB1</i>           | 7q21.12        | exon16:c.T1446T           | exon16:p.G482G        | 12.69        |
| <b>7</b> | <b>100771723</b> | <b>rs6090</b>         | <b>G/A</b>             | <b>rs6090</b>         | <b><i>SERPINE1</i></b> | <b>7q22.1</b>  | <b>exon2:c.G49A</b>       | <b>exon2:p.V17I</b>   | <b>14.70</b> |
| 7        | 100771765        | rs141347752           | G/A                    | rs141347752           | <i>SERPINE1</i>        | 7q22.1         | exon2:c.G91A              | exon2:p.V31M          | 12.71        |
| 7        | 100775298        | rs2227670             | C/T                    | rs2227670             | <i>SERPINE1</i>        | 7q22.1         | exon4:c.C648T             | exon4:p.D216D         | 13.12        |
| <b>7</b> | <b>150644759</b> | <b>rs199473016</b>    | <b>G/A</b>             | <b>rs199473016</b>    | <b><i>KCNH2</i></b>    | <b>7q36.1</b>  | <b>exon12:c.C2900T</b>    | <b>exon12:p.P967L</b> | <b>16.13</b> |
| 7        | 150644930        | rs199473436           | G/A                    | rs199473436           | <i>KCNH2</i>           | 7q36.1         | exon12:c.C2729T           | exon12:p.P910L        | 13.17        |
| 7        | 150647022        | rs370393086           | G/A                    | rs370393086           | <i>KCNH2</i>           | 7q36.1         | exon9:c.C2632T            | exon9:p.R878C         | 12.75        |
| 7        | 150647150        | chr7:150647150        | AG/A                   | rs546898924           | <i>KCNH2</i>           | 7q36.1         | exon9:c.2503delC          | exon9:p.L835fs        | 13.76        |
| 7        | 150655505        | rs139533994           | G/A                    | rs139533994           | <i>KCNH2</i>           | 7q36.1         | exon4:c.C558T             | exon4:p.G186G         | 12.77        |
| 7        | 150693556        | rs3918166             | G/A                    | rs3918166             | <i>NOS3</i>            | 7q36.1         | exon4:c.G335A             | exon4:p.R112Q         | 13.88        |
| <b>7</b> | <b>150693561</b> | <b>chr7:150693561</b> | <b>TCCCC<br/>GGC/T</b> | <b>chr7:150693561</b> | <b><i>NOS3</i></b>     | <b>7q36.1</b>  | <b>exon4:c.341_348del</b> | <b>exon4:p.S114fs</b> | <b>22.79</b> |
| 7        | 150704250        | rs2566514             | G/C                    | rs2566514             | <i>NOS3</i>            | 7q36.1         | exon17:c.C1998C           | exon17:p.A666A        | 12.18        |
| 7        | 150704310        | chr7:150704310        | C/T                    | rs779245100           | <i>NOS3</i>            | 7q36.1         | exon17:c.C2058T           | exon17:p.D686D        | 13.18        |
| 7        | 150707312        | rs34967063            | G/A                    | rs34967063            | <i>NOS3</i>            | 7q36.1         | exon21:c.G2622A           | exon21:p.L874L        | 15.82        |
| 7        | 150707344        | rs3918201             | G/T                    | rs3918201             | <i>NOS3</i>            | 7q36.1         | exon21:c.G2654T           | exon21:p.R885M        | 13.83        |
| 7        | 150710392        | rs3730011             | G/A                    | rs3730011             | <i>NOS3</i>            | 7q36.1         | exon25:c.G3180A           | exon25:p.E1060E       | 12.84        |
| 7        | 150710461        | chr7:150710461        | C/A                    | chr7:150710461        | <i>NOS3</i>            | 7q36.1         | exon25:c.C3249A           | exon25:p.N1083K       | 14.85        |
| 7        | 150710907        | rs3918211             | T/C                    | rs3918211             | <i>NOS3</i>            | 7q36.1         | exon26:c.T3351C           | exon26:p.V1117V       | 13.09        |
| <b>8</b> | <b>42033519</b>  | <b>rs1804182</b>      | <b>G/A</b>             | <b>rs1804182</b>      | <b><i>PLAT</i></b>     | <b>8p11.21</b> | <b>exon14:c.C1681T</b>    | <b>exon14:p.R561X</b> | <b>15.10</b> |
| 8        | 42036466         | rs62001886            | A/T                    | rs62001886            | <i>PLAT</i>            | 8p11.21        | exon13:c.T1479A           | exon13:p.A493A        | 12.88        |
| 8        | 42036577         | rs1136159             | A/G                    | rs1136159             | <i>PLAT</i>            | 8p11.21        | exon13:c.T1368C           | exon13:p.S456S        | 13.89        |

|           |                  |                       |            |                       |                       |                 |                         |                         |              |
|-----------|------------------|-----------------------|------------|-----------------------|-----------------------|-----------------|-------------------------|-------------------------|--------------|
| 8         | 42038169         | chr8:42038169         | C/A        | chr8:42038169         | <i>PLAT</i>           | 8p11.21         | exon10:c.G924T          | exon10:p.Q308H          | 12.90        |
| 8         | 42039483         | rs8178777             | C/T        | rs8178777             | <i>PLAT</i>           | 8p11.21         | exon9:c.G861A           | exon9:p.T287T           | 14.91        |
| 8         | 42042600         | chr8:42042600         | C/A        | chr8:42042600         | <i>PLAT</i>           | 8p11.21         | exon7:c.G630T           | exon7:p.E210D           | 13.92        |
| 8         | 42044954         | rs1058720             | A/G        | rs1058720             | <i>PLAT</i>           | 8p11.21         | exon6:c.C501C           | exon6:p.D167D           | 12.93        |
| <b>8</b>  | <b>121554236</b> | <b>chr8:121554236</b> | <b>G/A</b> | <b>chr8:121554236</b> | <b><i>SNTB1</i></b>   | <b>8q24.12</b>  | <b>exon6:c.C1338T</b>   | <b>exon6:p.C446C</b>    | <b>14.14</b> |
| 8         | 121587349        | rs116157159           | G/A        | rs116157159           | <i>SNTB1</i>          | 8q24.12         | exon4:c.C1113T          | exon4:p.H371H           | 12.95        |
| 8         | 121824054        | chr8:121824054        | A/AGCC     | rs547154887           | <i>SNTB1</i>          | 8q24.12         | exon1:c.29_30insGG<br>C | exon1:p.A10delins<br>AA | 13.06        |
| 8         | 121824063        | rs190526297           | C/A        | rs190526297           | <i>SNTB1</i>          | 8q24.12         | exon1:c.G21T            | exon1:p.A7A             | 12.97        |
| 10        | 8100578          | chr10:8100578         | C/G        | chr10:8100578         | <i>GATA3</i>          | 10p14           | exon3:c.C552G           | exon3:p.L184L           | 13.98        |
| <b>10</b> | <b>8100632</b>   | <b>rs2228254</b>      | <b>T/C</b> | <b>rs2228254</b>      | <b><i>GATA3</i></b>   | <b>10p14</b>    | <b>exon3:c.T606C</b>    | <b>exon3:p.R202R</b>    | <b>20.99</b> |
| <b>10</b> | <b>50943376</b>  | <b>rs113014306</b>    | <b>C/T</b> | <b>rs113014306</b>    | <b><i>OGDHL</i></b>   | <b>10q11.23</b> | <b>exon23:c.G2931A</b>  | <b>exon23:p.A977A</b>   | <b>13.00</b> |
| 10        | 50950976         | rs11101224            | G/A        | rs11101224            | <i>OGDHL</i>          | 10q11.23        | exon15:c.C1910T         | exon15:p.T637M          | 12.20        |
| 10        | 50951018         | rs34877195            | G/C        | rs34877195            | <i>OGDHL</i>          | 10q11.23        | exon15:c.C1868G         | exon15:p.S623C          | 12.22        |
| 10        | 50954850         | rs75974530            | G/A        | rs75974530            | <i>OGDHL</i>          | 10q11.23        | exon10:c.C1242T         | exon10:p.S414S          | 13.09        |
| 10        | 50964932         | rs140510079           | G/A        | rs140510079           | <i>OGDHL</i>          | 10q11.23        | exon3:c.C265T           | exon3:p.R89W            | 13.01        |
| <b>11</b> | <b>17408550</b>  | <b>rs5214</b>         | <b>T/C</b> | <b>rs5214</b>         | <b><i>KCNJ11</i></b>  | <b>11p15.1</b>  | <b>exon2:c.A828G</b>    | <b>exon2:p.S276S</b>    | <b>13.77</b> |
| 11        | 17408630         | rs5215                | T/C        | rs5215                | <i>KCNJ11</i>         | 11p15.1         | exon2:c.G748G           | exon2:p.V250V           | 12.64        |
| 11        | 17409531         | rs112070496           | C/T        | rs112070496           | <i>KCNJ11</i>         | 11p15.1         | exon1:c.G108A           | exon1:p.V36V            | 12.71        |
| <b>11</b> | <b>31814879</b>  | <b>rs3026384</b>      | <b>G/A</b> | <b>rs3026384</b>      | <b><i>PAX6</i></b>    | <b>11p13</b>    | <b>exon9:c.C1139T</b>   | <b>exon9:p.S380L</b>    | <b>22.08</b> |
| 11        | 31824263         | rs141873759           | G/T        | rs141873759           | <i>PAX6</i>           | 11p13           | exon5:c.C130A           | exon5:p.R44R            | 12.33        |
| 11        | 71164364         | rs148242268           | G/A        | rs148242268           | <i>NADSYN1</i>        | 11q13.4         | exon1:c.G22A            | exon1:p.A8T             | 12.21        |
| 11        | 71169547         | rs2276360             | G/C        | rs2276360             | <i>NADSYN1</i>        | 11q13.4         | exon3:c.G220C           | exon3:p.V74L            | 12.11        |
| <b>11</b> | <b>71169583</b>  | <b>rs35588716</b>     | <b>A/A</b> | <b>rs35588716</b>     | <b><i>NADSYN1</i></b> | <b>11q13.4</b>  | <b>exon3:c.G256A</b>    | <b>exon3:p.V86M</b>     | <b>17.12</b> |
| 11        | 71185443         | rs145980605           | C/T        | rs145980605           | <i>NADSYN1</i>        | 11q13.4         | exon9:c.C669T           | exon9:p.N223N           | 12.13        |
| 11        | 71185479         | rs2276354             | C/T        | rs2276354             | <i>NADSYN1</i>        | 11q13.4         | exon9:c.T705T           | exon9:p.C235C           | 12.13        |

|           |                  |                    |            |                    |                        |                 |                        |                        |              |
|-----------|------------------|--------------------|------------|--------------------|------------------------|-----------------|------------------------|------------------------|--------------|
| 11        | 71185504         | rs371173837        | G/A        | rs371173837        | <i>NADSYN1</i>         | 11q13.4         | exon9:c.G730A          | exon9:p.G244S          | 12.31        |
| 11        | 71185518         | rs2186778          | C/T        | rs2186778          | <i>NADSYN1</i>         | 11q13.4         | exon9:c.T744T          | exon9:p.I248I          | 12.14        |
| 11        | 71191851         | rs76770512         | G/C        | rs76770512         | <i>NADSYN1</i>         | 11q13.4         | exon11:c.G924C         | exon11:p.S308S         | 12.17        |
| 11        | 71192439         | rs59379414         | C/A        | rs59379414         | <i>NADSYN1</i>         | 11q13.4         | exon12:c.C1036A        | exon12:p.R346R         | 12.18        |
| 11        | 71195379         | rs116695422        | C/T        | rs116695422        | <i>NADSYN1</i>         | 11q13.4         | exon15:c.C1341T        | exon15:p.I447I         | 12.21        |
| 11        | 71209518         | chr11:71209518     | C/T        | rs768597235        | <i>NADSYN1</i>         | 11q13.4         | exon20:c.C2014T        | exon20:p.R672X         | 12.22        |
| 11        | 71212387         | rs12282060         | G/A        | rs12282060         | <i>NADSYN1</i>         | 11q13.4         | exon21:c.G2110A        | exon21:p.G704S         | 12.67        |
| <b>11</b> | <b>121323277</b> | <b>rs114331262</b> | <b>G/A</b> | <b>rs114331262</b> | <b><i>SORL1</i></b>    | <b>11q24.1</b>  | <b>exon1:c.G237A</b>   | <b>exon1:p.R79R</b>    | <b>14.42</b> |
| <b>12</b> | <b>115112554</b> | <b>rs78115331</b>  | <b>A/T</b> | <b>rs78115331</b>  | <b><i>TBX3</i></b>     | <b>12q24.21</b> | <b>exon7:c.T1186A</b>  | <b>exon7:p.S396T</b>   | <b>14.31</b> |
| 12        | 115112586        | rs141004177        | T/C        | rs141004177        | <i>TBX3</i>            | 12q24.21        | exon7:c.A1154G         | exon7:p.H385R          | 12.22        |
| 12        | 115112600        | rs376189812        | C/G        | rs376189812        | <i>TBX3</i>            | 12q24.21        | exon7:c.G1140C         | exon7:p.E380D          | 12.25        |
| 12        | 115118722        | rs35069811         | G/A        | rs35069811         | <i>TBX3</i>            | 12q24.21        | exon2:c.C619T          | exon2:p.L207L          | 12.99        |
| 12        | 115120811        | chr12:115120811    | C/A        | chr12:115120811    | <i>TBX3</i>            | 12q24.21        | exon1:c.G195T          | exon1:p.M65I           | 12.77        |
|           |                  |                    |            | 1                  |                        |                 |                        |                        |              |
| <b>14</b> | <b>23598952</b>  | <b>rs7157021</b>   | <b>G/A</b> | <b>rs7157021</b>   | <b><i>SLC7A8</i></b>   | <b>14q11.2</b>  | <b>exon9:c.T1170T</b>  | <b>exon9:p.Y390Y</b>   | <b>13.28</b> |
| 14        | 23598976         | rs17183863         | G/A        | rs17183863         | <i>SLC7A8</i>          | 14q11.2         | exon9:c.C1146T         | exon9:p.S382S          | 12.29        |
| <b>14</b> | <b>64694749</b>  | <b>rs17225885</b>  | <b>T/G</b> | <b>rs17225885</b>  | <b><i>ESR2</i></b>     | <b>14q23.2</b>  | <b>exon8:c.A1421C</b>  | <b>exon8:p.K474T</b>   | <b>14.43</b> |
| 14        | 64724051         | rs1256049          | C/T        | rs1256049          | <i>ESR2</i>            | 14q23.2         | exon11:c.G984A         | exon11:p.V328V         | 13.06        |
| <b>14</b> | <b>94844843</b>  | <b>rs1303</b>      | <b>T/G</b> | <b>rs1303</b>      | <b><i>SERPINA1</i></b> | <b>14q32.13</b> | <b>exon7:c.A1200C</b>  | <b>exon7:p.E400D</b>   | <b>16.32</b> |
| 14        | 94844975         | rs9630             | G/A        | rs9630             | <i>SERPINA1</i>        | 14q32.13        | exon7:c.C1068T         | exon7:p.A356A          | 12.33        |
| 14        | 94845824         | chr14:94845824     | CCT/.      | chr14:94845824     | <i>SERPINA1</i>        | 14q32.13        | exon6:c.1040delA       | exon6:p.E347fs         | 12.24        |
| 14        | 94847285         | rs1049800          | A/G        | rs1049800          | <i>SERPINA1</i>        | 14q32.13        | exon5:c.T840C          | exon5:p.D280D          | 12.35        |
| 14        | 94847351         | rs34112109         | C/T        | rs34112109         | <i>SERPINA1</i>        | 14q32.13        | exon5:c.G774A          | exon5:p.K258K          | 12.26        |
| 14        | 94847415         | rs6647             | G/A        | rs6647             | <i>SERPINA1</i>        | 14q32.13        | exon5:c.T710T          | exon5:p.V237V          | 12.37        |
| 14        | 94849201         | rs709932           | C/T        | rs709932           | <i>SERPINA1</i>        | 14q32.13        | exon4:c.G374A          | exon4:p.R125H          | 12.45        |
| <b>15</b> | <b>25924539</b>  | <b>rs1047700</b>   | <b>T/C</b> | <b>rs1047700</b>   | <b><i>ATP10A</i></b>   | <b>15q12</b>    | <b>exon21:c.A4449G</b> | <b>exon21:p.Q1483Q</b> | <b>12.39</b> |

|           |                 |                       |            |                    |                       |                 |                      |                     |              |
|-----------|-----------------|-----------------------|------------|--------------------|-----------------------|-----------------|----------------------|---------------------|--------------|
| 15        | 25924798        | rs9324127             | G/A        | rs9324127          | <i>ATP10A</i>         | 15q12           | exon21:c.C4190T      | exon21:p.A1397V     | 12.24        |
| 15        | 25967033        | rs28669028            | G/A        | rs28669028         | <i>ATP10A</i>         | 15q12           | exon7:c.C1134T       | exon7:p.Y378Y       | 12.24        |
| 15        | 25969041        | rs28377484            | C/T        | rs28377484         | <i>ATP10A</i>         | 15q12           | exon6:c.G1107A       | exon6:p.L369L       | 12.42        |
| 15        | 25969090        | rs17116056            | G/T        | rs17116056         | <i>ATP10A</i>         | 15q12           | exon6:c.C1058A       | exon6:p.S353Y       | 13.09        |
| 15        | 25971153        | rs116375025           | G/A        | rs116375025        | <i>ATP10A</i>         | 15q12           | exon5:c.C924T        | exon5:p.C308C       | 12.44        |
| 15        | 26026292        | rs140139603           | G/A        | rs140139603        | <i>ATP10A</i>         | 15q12           | exon2:c.C528T        | exon2:p.I176I       | 12.44        |
| <b>15</b> | <b>40698039</b> | <b>rs148189323</b>    | <b>C/T</b> | <b>rs148189323</b> | <b><i>IVD</i></b>     | <b>15q15.1</b>  | <b>exon1:c.C20T</b>  | <b>exon1:p.A7V</b>  | <b>14.46</b> |
| <b>15</b> | <b>48500116</b> | <b>rs139471047</b>    | <b>A/G</b> | <b>rs139471047</b> | <b><i>SLC12A1</i></b> | <b>15q21.1</b>  | <b>exon2:c.A200G</b> | <b>exon2:p.Q67R</b> | <b>15.34</b> |
| 15        | 48522594        | chr15:48522594        | G/A        | chr15:48522594     | <i>SLC12A1</i>        | 15q21.1         | exon7:c.G869A        | exon7:p.S290N       | 12.48        |
| 15        | 48539129        | rs138588696           | C/T        | rs138588696        | <i>SLC12A1</i>        | 15q21.1         | exon12:c.C1476T      | exon12:p.F492F      | 12.66        |
| 15        | 48539587        | rs6493311             | C/T        | rs6493311          | <i>SLC12A1</i>        | 15q21.1         | exon13:c.T1614T      | exon13:p.Y538Y      | 12.50        |
| <b>15</b> | <b>58830656</b> | <b>rs113174258</b>    | <b>G/A</b> | <b>rs113174258</b> | <b><i>LIPC</i></b>    | <b>15q21.3</b>  | <b>exon2:c.G213A</b> | <b>exon2:p.T71T</b> | <b>15.12</b> |
| 15        | 58830707        | rs7175412             | C/T        | rs7175412          | <i>LIPC</i>           | 15q21.3         | exon2:c.C264T        | exon2:p.H88H        | 12.52        |
| 15        | 58860963        | rs6074                | C/A        | rs6074             | <i>LIPC</i>           | 15q21.3         | exon9:c.C1437A       | exon9:p.T479T       | 12.53        |
| <b>16</b> | <b>1203830</b>  | <b>rs191613214</b>    | <b>A/A</b> | <b>rs191613214</b> | <b><i>CACNA1H</i></b> | <b>16p13.3</b>  | <b>exon2:c.G93A</b>  | <b>exon2:p.E31E</b> | <b>18.25</b> |
| 16        | 1203851         | chr16:1203851         | C/A        | chr16:1203851      | <i>CACNA1H</i>        | 16p13.3         | exon2:c.C114A        | exon2:p.R38R        | 12.55        |
| 16        | 1252016         | chr16:1252016         | TCAC/T     | rs760736442        | <i>CACNA1H</i>        | 16p13.3         | exon9:c.1567_1569del | exon9:p.523_523del  | 12.26        |
| 16        | 1270871         | rs59385968            | C/T        | rs59385968         | <i>CACNA1H</i>        | 16p13.3         | exon35:c.C6939T      | exon35:p.P2313P     | 12.57        |
| <b>16</b> | <b>16043641</b> | <b>chr16:16043641</b> | <b>C/T</b> | <b>rs562494702</b> | <b><i>ABCC1</i></b>   | <b>16p13.11</b> | <b>exon1:c.C33T</b>  | <b>exon1:p.G11G</b> | <b>15.58</b> |
| 16        | 16101738        | chr16:16101738        | C/T        | rs745945401        | <i>ABCC1</i>          | 16p13.11        | exon2:c.C114T        | exon2:p.L38L        | 12.59        |
| 16        | 16218655        | rs28363996            | C/T        | rs28363996         | <i>ABCC1</i>          | 16p13.11        | exon25:c.C3600T      | exon25:p.A1200A     | 12.26        |
| 16        | 16219729        | rs9933640             | C/T        | rs9933640          | <i>ABCC1</i>          | 16p13.11        | exon26:c.C3780T      | exon26:p.A1260A     | 12.61        |
| 16        | 16228242        | rs2230671             | G/A        | rs2230671          | <i>ABCC1</i>          | 16p13.11        | exon28:c.G4002A      | exon28:p.S1334S     | 12.78        |
| 16        | 16230427        | rs34526519            | C/T        | rs34526519         | <i>ABCC1</i>          | 16p13.11        | exon29:c.C4218T      | exon29:p.A1406A     | 12.65        |
| 16        | 16230442        | rs34327330            | C/T        | rs34327330         | <i>ABCC1</i>          | 16p13.11        | exon29:c.C4233T      | exon29:p.F1411F     | 12.64        |



|           |                 |                       |            |                    |                      |                 |                        |                        |              |
|-----------|-----------------|-----------------------|------------|--------------------|----------------------|-----------------|------------------------|------------------------|--------------|
| 16        | 16232272        | rs36115566            | G/A        | rs36115566         | <i>ABCC1</i>         | 16p13.11        | exon30:c.G4344A        | exon30:p.T1448T        | 12.85        |
| 16        | 16232380        | rs35148086            | C/T        | rs35148086         | <i>ABCC1</i>         | 16p13.11        | exon30:c.C4452T        | exon30:p.I1484I        | 12.66        |
| <b>16</b> | <b>30078564</b> | <b>rs368691859</b>    | <b>A/G</b> | <b>rs368691859</b> | <b><i>ALDOA</i></b>  | <b>16p11.2</b>  | <b>exon3:c.A151G</b>   | <b>exon3:p.T51A</b>    | <b>16.12</b> |
| 16        | 30078907        | rs76767223            | A/G        | rs76767223         | <i>ALDOA</i>         | 16p11.2         | exon8:c.A249G          | exon8:p.T83T           | 12.68        |
| <b>17</b> | <b>42327874</b> | <b>rs45497993</b>     | <b>A/G</b> | <b>rs45497993</b>  | <b><i>SLC4A1</i></b> | <b>17q21.31</b> | <b>exon20:c.T2688C</b> | <b>exon20:p.D896D</b>  | <b>15.69</b> |
| 17        | 42328598        | rs5026                | C/T        | rs5026             | <i>SLC4A1</i>        | 17q21.31        | exon19:c.G2584A        | exon19:p.V862I         | 12.27        |
| 17        | 42328928        | rs139912334           | C/T        | rs139912334        | <i>SLC4A1</i>        | 17q21.31        | exon18:c.G2340A        | exon18:p.L780L         | 12.71        |
| 17        | 42332587        | rs5020                | A/G        | rs5020             | <i>SLC4A1</i>        | 17q21.31        | exon15:c.T1878C        | exon15:p.D626D         | 12.22        |
| 17        | 42334822        | rs45568837            | C/T        | rs45568837         | <i>SLC4A1</i>        | 17q21.31        | exon13:c.G1522A        | exon13:p.E508K         | 12.73        |
| 17        | 42335443        | rs150913170           | G/A        | rs150913170        | <i>SLC4A1</i>        | 17q21.31        | exon11:c.C1193T        | exon11:p.T398I         | 12.74        |
| 17        | 42335944        | rs5013                | C/T        | rs5013             | <i>SLC4A1</i>        | 17q21.31        | exon10:c.G924A         | exon10:p.L308L         | 12.55        |
| 17        | 42338945        | rs5036                | T/C        | rs5036             | <i>SLC4A1</i>        | 17q21.31        | exon4:c.A166G          | exon4:p.K56E           | 12.76        |
| <b>19</b> | <b>7125297</b>  | <b>rs1799817</b>      | <b>G/A</b> | <b>rs1799817</b>   | <b><i>INSR</i></b>   | <b>19p13.2</b>  | <b>exon17:c.C3255T</b> | <b>exon17:p.H1085H</b> | <b>18.77</b> |
| 19        | 7126632         | rs191756282           | G/A        | rs191756282        | <i>INSR</i>          | 19p13.2         | exon16:c.C2976T        | exon16:p.Y992Y         | 12.78        |
| 19        | 7132218         | rs111502197           | C/T        | rs111502197        | <i>INSR</i>          | 19p13.2         | exon14:c.G2793A        | exon14:p.A931A         | 12.49        |
| <b>19</b> | <b>11222300</b> | <b>rs11669576</b>     | <b>G/A</b> | <b>rs11669576</b>  | <b><i>LDLR</i></b>   | <b>19p13.2</b>  | <b>exon8:c.G1171A</b>  | <b>exon8:p.A391T</b>   | <b>16.28</b> |
| 19        | 11224265        | rs5930                | G/A        | rs5930             | <i>LDLR</i>          | 19p13.2         | exon10:c.A1413A        | exon10:p.R471R         | 12.81        |
| 19        | 11240268        | chr19:11240268        | T/C        | chr19:11240268     | <i>LDLR</i>          | 19p13.2         | exon17:c.T2469C        | exon17:p.F823F         | 12.55        |
| <b>19</b> | <b>34855821</b> | <b>chr19:34855821</b> | <b>G/A</b> | <b>rs549433538</b> | <b><i>GPI</i></b>    | <b>19q13.11</b> | <b>exon1:c.G7A</b>     | <b>exon1:p.A3T</b>     | <b>14.83</b> |
| 19        | 34868415        | chr19:34868415        | G/A        | rs867154141        | <i>GPI</i>           | 19q13.11        | exon6:c.G410A          | exon6:p.R137Q          | 12.84        |
| 19        | 34868642        | rs1801015             | A/G        | rs1801015          | <i>GPI</i>           | 19q13.11        | exon7:c.A489G          | exon7:p.G163G          | 12.85        |
| 19        | 34872382        | rs1864139             | G/A        | rs1864139          | <i>GPI</i>           | 19q13.11        | exon10:c.G762A         | exon10:p.K254K         | 12.66        |
| 19        | 34890198        | rs34604585            | G/C        | rs34604585         | <i>GPI</i>           | 19q13.11        | exon16:c.G1356C        | exon16:p.A452A         | 12.22        |
| <b>20</b> | <b>25259006</b> | <b>rs2228976</b>      | <b>G/T</b> | <b>rs2228976</b>   | <b><i>PYGB</i></b>   | <b>20p11.21</b> | <b>exon8:c.G907T</b>   | <b>exon8:p.A303S</b>   | <b>18.88</b> |
| 20        | 25260931        | rs2227890             | A/G        | rs2227890          | <i>PYGB</i>          | 20p11.21        | exon10:c.A1122G        | exon10:p.A374A         | 14.39        |



## Supplemental methods

### 1. Introduction

The African continent harbours the greatest genetic and environmental diversity<sup>1,2</sup> and has the highest health burden per capita<sup>3</sup>, yet there is a scarcity of large-scale disease-specific genome studies of African populations<sup>4,5</sup>. Sickle cell disease (SCD) has its highest burden in Africa, particularly in Central and West Africa. Here, we report the first study on deleterious variants in deep whole exome sequencing of 192 individuals. This is the first data on whole exome sequencing landscape of SCD in Africa, which has generated a novel database of candidate modifier genes. The exome data provided will serve the global community as it represents the first step of a series of studies on the genomic architecture of SCD, which will be enhanced by the establishment of major NIH-funded research consortia for the study of SCD in Africa<sup>6</sup>. **Figure S1** describes the overall pipeline used for data generation and analyses.

### 2. Sample Collection

#### 2.1 *Ethics Statement*

The study was performed in accordance with the guidelines of the Helsinki Declaration. Ethical approval was given by the National Ethical Committee Ministry of Public Health, Republic of Cameroon (No 033/CNE/DNM/07) and the University of Cape Town, Faculty of Health Sciences Human Research Ethics Committee (HREC RE: 132/2010). Written and signed informed consent was obtained from the adult participants who were 18 years or older, and for the children consent was obtained from parents/guardians with an assent from the participants older than seven years of age.

#### 2.2 *Patients and assessment of clinical events*

The recruitment for the discovery group was conducted in Cameroon at the Yaoundé Central Hospital and Laquintinie Hospital in Douala, as previously described<sup>7</sup>. Briefly, socio-demographic and clinical data were collected by means of a structured questionnaire. Anthropomorphic variables were

measured in the outpatient setting. Routine blood counts of patients and haemoglobin (Hb) electrophoresis were conducted on arrival at the hospital. In the present study, three sub-groups of SCD patients were included: 1) the “stroke” group made of SCD patients with at least one clinical episode of overt stroke, a devastating complication of SCD, occurring in 11% of patients before age 20 years and considered to be a proxy of severity<sup>8</sup>, influenced by genetic modifiers<sup>9</sup>; 2) the “long survivor” SCD group made of patients older than 40 years considered here as the most genetically fit; whose cut off was based on life expectancy of 43 years for SCD-HbSS in the cooperative study conducted four decades ago in the USA<sup>8</sup>; 3) the “random” group made of SCD patients randomly selected among clinical stable patients without incidence of any cerebrovascular disease by clinical criteria and younger than 40 years.

The replication cohort consisted of adult SCD patients recruited at the Haematology Clinic, Groote Schuur Hospital in Cape Town, that are mostly recent migrants from other sub-Saharan African countries where SCD is prevalent<sup>10</sup>. In order to have a similar genetic background for this replication group, only patients from Democratic Republic of Congo (DRC) were included in the present study. Details of sample information are in **Table S2**

### ***2.3 Control participants***

A total of 58 ethnically matched Cameroonian controls were randomly recruited from healthy blood donors in Yaoundé<sup>11</sup> and volunteered their participation in the study. Only individuals, without HbS mutation and that were homozygous HbAA as confirmed by molecular analysis, were included.

## **3. Library Construction and Sequence**

### ***3.1 Molecular methods: Sickle cell anaemia mutation, $\beta$ -globin gene cluster haplotypes, and 3.7 kb $\alpha$ -globin gene deletion***

DNA was extracted from peripheral blood following the manufacturer’s instructions (Puregene Blood Kit; Qiagen, Hilden, Germany). Molecular analysis was performed to determine the presence of the sickle mutation and was carried out on 200 ng DNA by polymerase chain reaction (PCR) to amplify a 770 bp segment of the  $\beta$ -globin gene. This was, followed by DdeI restriction analysis of the PCR product<sup>12,13</sup>. Using published primers and

methods, five restriction fragment length polymorphism (RFLP) sites in the  $\beta$ -globin gene cluster were amplified to analyse the XmnI (5'G $\gamma$ ), HindIII (G $\gamma$ ), HindIII (A $\gamma$ ), HincII (3 $\psi\beta$ ') and HinfI (5' $\beta$ ) for the HBB haplotype background<sup>11</sup>. The 3.7 kb  $\alpha$ -globin gene deletion was successfully screened, using the expand-long template PCR (Roche Diagnostics, Basel, Switzerland), as previously published<sup>11,14</sup>.

### ***3.2 Whole Exome Sequencing and Accuracy of exome variant detection***

DNA samples underwent sequencing at the Omega Bioservices, Omega Bio-tek, Inc, Emory University USA. DNA concentrations were accurately determined using a picogreen fluorescent detection method (Quant-iT; Invitrogen). Equal amounts of DNA from each sample constituting a pool were manually combined before WES. The Roche Nimblegen SeqCap EZ MedExome v2.0 (~47Mb target) were used for sequence capture. The MedExome Kit was designed to provide sequencing coverage for gene annotations from several sources (i.e. Refseq, Ensemble and GENCODE) as well as miRBase, and enhanced coverage of medically relevant genes such as those in GeneTests, OMIM, ClinVar. All protocols for shotgun library construction for exome capture have been automated on a Perkin-Elmer Janus II liquid handling robot or multi-channel pipettors. After shotgun library construction, library concentrations and molecular weight distributions are determined in parallel on an Agilent Bioanalyzer in order to flag low-quality libraries prior to exome capture. Samples passing quality control, library preparation and exome capture are sequenced on an Illumina HiSeq 4000 sequencer. WES was generated on the HiSeq X.

## **4. Reads Mapping and Alignment**

To insure the forward and reverse reads are of high quality and appropriate length, we evaluate these using used both FastQC<sup>15</sup> and SolexaQA++<sup>16</sup>. From the UCSC database<sup>17</sup>, we obtained the human reference genome, version hg19 (build37), together with its gene annotation. The reads were aligned to the UCSC hg19 (build37) complete reference genome using BWA<sup>18,19</sup>. Using the Picard tool kit<sup>20</sup>, the duplicate reads were marked, and after alignment, the BAM files were sorted by coordinates, indexed and read groups were added via Picard<sup>20</sup>. BAM files were re-ordered according to UCSC hg19<sup>17</sup>. Insertions and deletions at the end of the reads can misguide the aligners into mis-aligning with mismatches. This artificial mismatch can

mislead base quality score recalibration and variant detection. To address this issue, we used the Genome Analysis Toolkit (GATK) software<sup>20</sup> for local realignment along all reads at a problematic locus to create a cleaned version of the BAM file and found a best consensus sequence that, together with the reference, best fits the reads in a pile. We used the 1000 genomes phase 1 INDELs and Mills and 1000 genomes gold standard INDELs<sup>21</sup> to drive the process. Using these known sites improves the accuracy. After INDEL realignment we applied Picard “FixMateInformation” to recalculate read pair information to see if it has changed. At this stage all 192 samples have > 79% of target bases covered to ~35x.

## 5. Variant Calling

As different calling methods produce a large number of differing variants and previous studies have demonstrated that these methods have differing advantages<sup>22,23,24</sup>, we adopted an ensemble approach implemented in VariantMetaCaller<sup>25</sup> in each data set of subjects group and the all dataset of 192 subjects. To detect SNPs and short indels, we combined information generated from three independent variant caller pipelines (**Figure S1**): (1) An incremental joint variant discovery implemented in GATK 3.0 HaplotypeCaller<sup>20</sup>, which calls samples independently to produce gVCF files and leverages the information from the independent gVCF file to produce a final call-set at the genotyping step; (2) FreeBayes<sup>26</sup> and (3) samtools via mpileup<sup>27</sup> variant callers (**Figure S1**). The best practice specific to each caller were adopted<sup>28</sup>.

## 6. Variant Calling Quality Control and Final Call-set

Before applying the ensemble approach from the resulting variant sets per subject group and all subjects from each these three callers respectively, we filtered each resulting VCF files using the GATK tool “VariantFiltration”.

### 6.1 Flagging Variants

We added additional filter levels to each call set as follows: (1) If 3 SNPs are detected within a window of 10 base-pairs, the site will be flagged as a “SNPcluster” in the FILTER column (2) if 4 or more alignments having a mapping quality of MQ = 0 (which means it maps to different locations equally well) and the number of alignments that mapped ambiguously are more than a tenth of all alignments, it is difficult to decipher artefacts and true

differences. These sites will be flagged as “HARD\_TO\_VALIDATE”, (3) SNPs which are covered by less than 5 reads may be potential artefacts and these sites was flagged as “LowCoverage”, (4) SNPs having a SNP quality below 30 are typically artefacts, were flagged as “VeryLowQual”, (5) SNPs having a quality score between 30 and 50 are potential artefacts, flagged as “LowQual”, (6) SNPS having a QD score  $< 1.5$  are indicative of false positive calls and artefacts, flagged as “LowQD” (7) and SNPs covered only by sequences on the same strand are often artefacts, was flagged as “StrandBias”.

### ***6.2 Variants Quality Control Assessment Prior Final Call-set***

Variants flagged “VeryLowQual”, “LowQual”, “LowQD” and “StrandBias” were removed in each VCF files. Exomes VCF files were assessed according to the total reads, coverage distribution, raw error rates, transition/transversion (Ti/Tv) ratios (3.2), comparison of genomic sex to recorded sex, distribution of known variants (relative to dbSNP), CytoSNP array fingerprint concordance  $> 99\%$ , homozygosity, heterozygosity, and sample contamination validation. Additionally, variant sites that strongly deviate from Hardy-Weinberg equilibrium ( $p$ -value  $< 5 \times 10^{-5}$ ) were flagged. These criteria reduce the inclusion of false-positive variant calls during the ensemble of the VCF files.

The final call-set from each subjects group, were produced from VariantMetaCaller<sup>25</sup>, a support vector machines approach that combined the hard-filtered VCF files obtained from these three variants callers.

## **7. Variant Annotation and Mutation Prioritization**

After high confidence variants were called using VariantMetaCaller from each dataset include 3 Cameroonian SCD categories; namely 56 moderate SCD patients, 26 stroke SCD patients, 23 survival SCD individuals for the discovery analysis, 58 Cameroon control samples and 29 SCD patients from the DRC for <sup>replication</sup> analysis. We used ANNOVAR<sup>29</sup> to independently perform gene-based annotation in each final VCF data set to determine whether SNPs cause protein coding changes and produce a list of the amino acids that are affected. We used ANNOVAR “2016Dec18” setting, where the population frequency, pathogenicity for each variant was obtained from 1000 Genomes exome<sup>21</sup>, Exome Aggregation Consortium<sup>30</sup> (ExAC), targeted exon datasets and COSMIC<sup>31</sup>. Gene functions were obtained from RefGene<sup>32</sup> and different functional predictions were obtained from ANNOVAR's

library, which contains up to 21 different functional scores including SIFT<sup>33,34</sup>, LRT<sup>35</sup>, MutationTaster<sup>36</sup>, MutationAssessor<sup>37,38</sup>, FATHMM<sup>39</sup>, fathmm-MKL<sup>39</sup>, RadialSVM<sup>40</sup>, LR<sup>40</sup>, PROVEAN<sup>40</sup>, MetaSVM<sup>40</sup>, MetaLR<sup>40</sup>, CADD<sup>41</sup>, GERP++<sup>42</sup>, DANN<sup>29</sup>, M-CAP<sup>29</sup>, Eigen<sup>29</sup>, GenoCanyon<sup>29</sup>, Polyphen2 HVAR<sup>43</sup>, Polyphen2 HDIV<sup>43</sup>, PhyloP<sup>44</sup> and SiPhy<sup>44</sup>. We additionally included conservative and segmental duplication sites, dbSNP code and clinical relevance reported in dbSNP<sup>45</sup>. From each resulting functional annotated data set, we independently filtered for predicted functional status (of which each predicted functional status is of "deleterious" (D), "probably damaging" (D), "disease\_causing\_automatic" (A) or "disease\_causing" (D)).<sup>46,47,49</sup> from SIFT, LRT, MutationTaster, MutationAssessor, FATHMM, fathmm-MKL, RadialSVM, LR, PROVEAN, MetaSVM, MetaLR, CADD, GERP++, DANN, M-CAP, Eigen, GenoCanyon, Polyphen2 HVAR, Polyphen2 HDIV, PhyloP, and SiPhy.

We used a casting vote approach, by retaining only a variant if it had at least 17 predicted functional status "D" or "A" out of 21. Second, the retained variants from each data set were further filtered for rarity, exonic variants, and nonsynonymous mutations and with high quality call as describe above, yielding a final candidate list of predicted mutant variants in each subject group, including the replication group. To compare the results from the above strategy, we re-applied FATHMM<sup>22</sup>, a disease-specific weighting scheme, which uses a Hidden Markov Models prediction algorithm capable of discriminating between disease-causing mutations and neutral polymorphisms. We report on the aggregated SiPhy score from all identified mutants SNPs within gene.

## 8. Network and Enrichment Analysis

### 8.1 Reconstruction of Sub-network

To identify sub-networks of interactive mutant variant genes (**section 7** above) or from gene-specific difference in SNPs frequencies genes (**section 13** below) from each SCD category occurred, we used a comprehensive human Protein-Protein Interaction (PPI) network<sup>50,51,52,53,54,55</sup> to analyse how each set of variant genes are layered and interact within a biological network, thus extracting a sub-network. A clustering script in R's (R Core Team, 2016)

igraph package was used to determine a network plot that would allow us to identify the hub proteins in the sub-networks.

### **8.2 Enrichment of genes within Sub-network**

We examined these candidate variants genes from either mutation prioritization (**section 7** above) or gene-specific difference in SNPs frequencies (see **section 13** below) are interact with other genes and how in the formed sub-network they can be associated with human phenotypes and what are their pathways, biological processes and molecular functions. To address this, we used a custom script and adopted to compare our results with different tools including DAVID<sup>56</sup> and PANTHER<sup>57</sup>. We additionally conducted an enrichment analysis using the Enrichr software<sup>58</sup>. The most significant pathway enriched for genes in the networks were selected from KEGG<sup>59</sup>, Panther<sup>57</sup>, Biocarta<sup>60</sup> and Reactome<sup>61</sup>, and gene ontologies from the Gene Ontology Consortium<sup>62</sup> were defined for cellular component, biological process and molecular function.

### **9. Further Characterization of Enriched Sub-networks.**

To identify the association between each sub-network  $S_j$ , ( $j=1, \dots, T$ ) within  $n_1, \dots, n_T$  genes to human pathway,  $P_k \in P$  the set of human pathways. We obtained 1,547 annotated pathways<sup>51,52,53,54,55</sup> and collected more than 107 annotated pathways from the KEGG<sup>59</sup>, BioCarta<sup>60</sup> and Ambion GeneAssist<sup>TM</sup> Pathway Atlas pathway databases. We downloaded genomic co-ordinates for all genes from the NCBI ftp-server<sup>45</sup> and retained only entries for the human reference sequence. We assigned the SNPs located within a gene or in LD within less than 40kb distance up/downstream of the gene using dbsnp database<sup>45</sup>. Let a number of genes in the intersection between genes within  $S_j$  and genes within pathway  $P_k$ . Let  $b$  be the number of genes in the intersection between genes within  $S_j$  and those in the union of all pathways  $P_{k(k=1, \dots, K)}$ . Let  $n$  be the number of genes in the intersection between genes in the  $P_j$  pathway and those in the union of all pathways  $P_{k(k=1, \dots, K)}$  with  $k \neq j$ , and  $m$  be the total number of genes in all pathways  $P_{k(k=1, \dots, K)}$ . We computed the statistic of significance of overlap between sub-network  $S_j$ , of  $n_t$  genes and a given pathway  $P_k$  using the z-score (ZS), which employs the binomial proportion test,

$$Z_S = \frac{\left(\frac{a}{n} - \frac{b}{m}\right)}{\sqrt{\frac{\frac{b}{m}}{m}}}$$

### 10. Procedure to Aggregating SNPs Summary Statistics at the Gene level.

From each subject group, we estimated the statistical significance at gene level from the list of resulting genes associated to predict mutant variants (**section 7** above) or from the list of candidate gene-specific difference in SNP frequencies (**section 13** below). In doing so, we aggregated the P-values from SNPs 40kb downstream and upstream gene region (exon) as per gene-based annotation file in our exome datasets. Under the null hypothesis, p-values  $p_k$  ( $k = 1, \dots, L$ ) for a test-statistic with a continuous distribution are uniformly distributed in the interval  $[0,1]$ . It follows that a parametric cumulative distribution function  $F$  can be chosen and  $p_k$  can be transformed into quantiles according to  $q_k = F^{-1}(p_k)$ . The combined test statistic  $C^p = \frac{\sum_{k=1}^L q_k}{\sqrt{L}}$  is a sum of independent and identically distributed random variables  $q_k$ . To account for the independence assumption given correlation among neighbouring genomic markers, we implement the Stouffer-Liptak method accounting for spatial correlations among SNPs within a gene or SNPs within a given sub-network. The overall statistic can be obtained by  $p = \Phi(C^p)$ , in which  $\Phi$  is the cumulative distribution function of the standard normal distribution. We apply the Benjamini-Hochberg false-discovery correction method to control the type I error rate and account for gene/sub-network differences in the numbers of associated SNPs. From each subject group, we reported on the overall statistical significance of gene mutational burden gene, p-values after the Benjamini-Hochberg false-discovery correction.



## 11. Phased and Haplotypes Inference

From the VCF file resulted from joint variant calling (section VI above), a merged dataset of all 192 samples (58 Hb AA Cameroon controls, a replication cohort of 29 SCD patients from DRC, 56 random, 26 Stroke, and 23 survival SCD patients and 58 controls from Cameroon. We further conducted quality control to remove all structured, indel, multi-allelic variants and those with low minor allele frequency ( $MAF < 0.05$ ) prior to phasing. We first phased and inferred the haplotypes using Eagle<sup>66</sup> from the resulting curated data.

Second, we extracted and re-phased samples from the 1000 Genomes Project<sup>21</sup>. To merge our exomic haplotypes to those from 1000 Genomes, we computed a cross-imputation using impute2<sup>67</sup>. We performed further quality control after the imputation, which consisted of removal of variants with low minor allele frequency ( $MAF < 0.05$ ); low genotypes call ( $\leq 95\%$ ) and imputation accuracy ( $< 955$ ) prior to re-phasing using Eagle<sup>66</sup>. We performed a post-phasing quality control in which we checked the switch-error between our exomic haplotypes panel and the exomic haplotypes merged to 1000 Genomes panel<sup>21</sup>, where 99.7% and 97,05% of the sites were with no phase switch-error in both panels, respectively. We further compared sites discordance between these haplotype panels and independently with their original VCF file prior phasing. The only site with phase switch-errors showed discrepancies in MAF and were therefore removed.

## 12. Fine-scale Population Structure

Population structure analyses were performed to characterize the genetic contributions to our 192 patient samples. We first tested whether populations conform to an isolation-by-distance model or whether there is strong heterogeneity among populations relative to geographic distance. To this end, we have merged our 192 samples with data from 1000 Genomes Projects in which we performed principal component analysis using smartpca in the EIGENSOFT package<sup>68,69</sup> and included all SNP haplotypes shared between the populations analysed. Population-specific pair-wise genetic distance ( $F_{ST}$ ) and a phylogeny tree was computed from smartpca. All the 192 samples, including the SCD from DRC were observed to cluster together,

indicating geographic and genetics proximity. Table below displays the population-specific  $F_{ST}$ , indicating close genetic relatedness between SCD groups from Cameroon as well as relatedness between SCD patients from DRC and the Control Cameroon group. The data suggests an isolation-by-distance model.

**Table S3** Pair-wise Population genetic distance among 58 Hb AA Cameroon controls, a replication cohort of 29 SCD patients from DRC, 56 random, 26 Stroke and 23 survivor SCD patients from Cameroon.

| FST                        | SCD Cameroon Long Survivor | SCD Cameroon Random | SCD DRC | SCD Cameroon Stroke | Control Cameroon |
|----------------------------|----------------------------|---------------------|---------|---------------------|------------------|
| SCD Cameroon Long Survivor | -                          | 0.001               | 0.006   | 0.002               | 0.003            |
| SCD Cameroon Random        | 0.001                      | -                   | 0.004   | 0.001               | 0.002            |
| SCD DRC                    | 0.006                      | 0.004               | -       | 0.005               | 0.003            |
| SCD Cameroon Stroke        | 0.002                      | 0.001               | 0.005   | -                   | 0.002            |
| Control Cameroon           | 0.003                      | 0.002               | 0.003   | 0.002               | -                |

### 13. Unusual Genetic Difference: SNP-specific differences in allele frequency

Similarly, to<sup>70,71</sup>, and assuming the population evolved under the Wright-Fisher model, selective neutrality and with an expected number of mutations, we used a step-wise constant effective population size<sup>70</sup> to compute allele frequency spectrum. We secondly computed the pair-wise group frequency

spectrum difference at SNP level, thus SNP allele frequency spectrum difference are assigned to a given gene if they are located within the gene's 40kb downstream or upstream using dbsnp database, thus aggregating SNPs allele frequency difference into genes<sup>51,52,53,54,55</sup>. To this end, let  $f_i^1$  and  $f_i^2$  be the allele frequency spectrum in group 1 and group 2, respectively. To minimize deviation from the normality assumption, SNPs with minor allele frequencies  $< 0.05$  are excluded. Thus, at a given locus  $i$ , the difference  $f_i = (f_i^1 - f_i^2)$  between observed variant allele frequencies of two groups 1 and 2. Let gene  $j$  ( $j = 1, \dots, N$ ) has  $n_j$  associated SNPs, thus  $d_j = \frac{\sum_{i=1}^{n_j} f_i}{n_j}$  is gene  $j$  ( $j=1, \dots, N$ ) frequency difference from group 1 and 2, and can be approximated as a normal distribution under neutral drift with mean 0 and variance<sup>71,72</sup>

$$d(1-d) \left( 2F_{ST} + \frac{1}{n_j} \right)$$

where  $F_{ST}$  is the genetic distance between the group 1 and 2

$$d = \frac{\sum_{i=1}^{n_j} (f_i^1 + f_i^2)}{2}$$

total variant allele counts in each population, and  $p$  is the overall gene-specific ancestral frequency that is approximated as the average of the two observed variant allele frequencies from  $n_j$  SNPs associated to gene  $j$ . Similar to<sup>70,71</sup>, we test unusual gene-specific difference  $U_{12}$  from groups 1 and 2 as follows

$$U_{12}^j = \frac{(d_j)^2}{d(1-d) \left( 2F_{ST} + \frac{1}{n_j} \right)}$$

This equation is  $\chi^2$  distributed with 1 degree of freedom (d.o.f). An excess of large values of the  $\chi^2$  statistic indicates deviations from the null model, suggesting the action of natural selection<sup>71,72</sup>. We applied this method to each group-pair from the three groups of SCD. Finally, SNP-specific unusual allele frequency summary statistics of SNPs within gene region can be aggregated (**see section 10** above) to obtain gene-specific differences in SNP frequencies.

## 16. Supplemental references

1. Tishkoff, S. A. et al. The genetic structure and history of Africans and African Americans. *Science* 324, 1035-44 (2009).
2. Henn, B. M. et al. Distance from sub-Saharan Africa predicts mutational load in diverse human genomes. *Proc. Natl. Acad. Sci.* 113, E440-E449 (2016).
3. Ramsay, M., Tiemessen, C. T., Choudhury, A. & Soodyall, H. Africa: the next frontier for human disease gene discovery? *Hum. Mol. Genet.* 20, R214-20 (2011).
4. Bustamante, C. D., Burchard, E. G. & De la Vega, F. M. Genomics for the world. *Nature* 475, 163-5 (2011).
5. H3Africa Consortium et al. Research capacity. Enabling the genomic revolution in Africa. *Science* 344, 1346-8 (2014).
6. Makani, J., Ofori-Acquah, S.F., Tluway, F., Mulder, N. and Wonkam, A., 2017. Sickle cell disease: tipping the balance of genomic research to catalyse discoveries in Africa. *Lancet* (London, England), 389(10087), p.2355.
7. Wonkam, A., Bitoungui, V.J.N., Vorster, A.A., Ramesar, R., Cooper, R.S., Tayo, B., Lettre, G. and Ngogang, J., 2014. Association of variants at BCL11A and HBS1L-MYB with hemoglobin F and hospitalization rates among sickle cell patients in Cameroon. *PloS one*, 9(3), p.e92506.
8. Platt, O.S. et al. Mortality in sickle cell disease life expectancy and risk factors for early death. *New England Journal of Medicine.* 330(23), 1639-1644 (1994).
9. Flanagan JM, Sheehan V, Linder H, et al. (2013). Genetic mapping and exome sequencing identify 2 mutations associated with stroke protection in pediatric patients with sickle cell anemia. *Blood* 121, 3237-3245.
10. Pule, G.D., Ngo Bitoungui, V.J., Chetcha Chemegni, B., Kengne, A.P. and Wonkam, A., 2016. Studies of novel variants associated with Hb F in Sardinians and Tanzanians in sickle cell disease patients from Cameroon. *Hemoglobin*, 40(6), pp.377-380.
11. Rumaney, M.B., Bitoungui, V.J.N., Vorster, A.A., Ramesar, R., Kengne, A.P., Ngogang, J. and Wonkam, A., 2014. The co-inheritance of alpha-thalassemia and sickle cell anemia is associated with better hematological indices and lower consultations rate in Cameroonian patients and could improve their survival. *PLoS One*, 9(6), p.e100516.

12. Saiki RK, et al. Enzymatic amplification of beta-globin genomic sequences and restriction site analysis for diagnosis of sickle cell anemia. *Science (New York, N.Y.)* 1985; 230:1350-1354.
13. Darbari, D.S., Wang, Z., Kwak, M., Hildesheim, M., Nichols, J., Allen, D., Seamon, C., Peters-Lawrence, M., Conrey, A., Hall, M.K. and Kato, G.J., 2013. Severe painful vaso-occlusive crises and mortality in a contemporary adult sickle cell anemia cohort study. *PLoS One*, 8(11), p.e79923.
14. Bitoungui, V.J.N., Pule, G.D., Hanchard, N., Ngogang, J. & Wonkam, A. (2015) Beta-globin gene haplotypes among cameroonians and review of the global distribution: is there a case for a single sickle mutation origin in Africa? *Omics: a Journal of Integrative Biology*, 19, 171-179.
15. Auwera, G.A. et al. From FastQ data to high-confidence variant calls: the genome analysis toolkit best practices pipeline. *Current Protocols in Bioinformatics*, 11-10 (2013).
16. Cox, M.P. et al. SolexaQA: At-a-glance quality assessment of Illumina second-generation sequencing data. *BMC bioinformatics*, 11(1), p.1 (2010).
17. Rosenbloom, K.R. et al. The UCSC Genome Browser database: 2015 update. *Nucleic Acids Res.* 43(Database issue):D670-81 (2015).
18. Li, H. et al. Fast and accurate short read alignment with Burrows-Wheeler transform. *Bioinformatics*, 25(14):1754-1760 (2009).
19. Li H, Ruan J, Durbin R: Mapping short DNA sequencing reads and calling variants using mapping quality scores. *Genome Res*, 18(11):1851-1858 (2008).
20. McKenna, A. et al. The Genome Analysis Toolkit: a MapReduce framework for analyzing next-generation DNA sequencing data. *Genome Res.* 20(9):1297-1303 (2010).
21. 1000 Genomes Project Consortium, 2012. An integrated map of genetic variation from 1,092 human genomes. *Nature*, 491(7422), pp.56-65.
22. DePristo, M.A. et al. A framework for variation discovery and genotyping using next-generation DNA sequencing data. *Nat Genet*, 43(5):491-498 (2011).
23. Liu, X. et al. Variant callers for next-generation sequencing data: a comparison study. *PLoS One*. 8(9):e75619 (2013).

24. Liu, Q. et al. Steps to ensure accuracy in genotype and SNP calling from Illumina sequencing data. *BMC Genomics* 13 Suppl 8:S8 (2012).
25. Gézsi, A. et al. VariantMetaCaller: automated fusion of variant calling pipelines for quantitative, precision-based filtering. *BMC genomics*, 16(1), p.1 (2015).
26. Li, H. A. et al. statistical framework for SNP calling, mutation discovery, association mapping and population genetical parameter estimation from sequencing data. *Bioinformatics*. 27(21):2987-93 (2011).
27. Garrison, E. et al. Haplotype-based variant detection from short-read sequencing. *arXiv preprint arXiv:1207.3907* (2012).
28. Cornish, A. et al. A comparison of variant calling pipelines using genome in a bottle as a reference. *BioMed research international*, 456479, 11 (2015).
29. Wang, K. et al. ANNOVAR: Functional annotation of genetic variants from next-generation sequencing data *Nucleic Acids Research*, 38:e164 (2010).
30. Karczewski, K.J., Weisburd, B., Thomas, B., Solomonson, M., Ruderfer, D.M., Kavanagh, D., Hamamsy, T., Lek, M., Samocha, K.E., Cummings, B.B. and Birnbaum, D., 2016. The ExAC browser: displaying reference data information from over 60 000 exomes. *Nucleic acids research*, 45(D1), pp.D840-D845.
31. Forbes, S.A., Beare, D., Gunasekaran, P., Leung, K., Bindal, N., Boutselakis, H., Ding, M., Bamford, S., Cole, C., Ward, S., Kok, C.Y., Jia, M., De, T., Teague, J.W., Stratton, M.R., McDermott, U., Campbell, P.J., 2015. COSMIC: Exploring the world's knowledge of somatic mutations in human cancer. *Nucleic Acids Res.* 43, D805-D811.
32. O'Neill, K., Pujar, S., Rangwala, S.H., Rausch, D., Riddick, L.D., Schoch, C., Shkeda, A., Storz, S.S., Sun, H., Thibaud-Nissen, F., Tolstoy, I., Tully, R.E., Vatsan, A.R., Wallin, C., Webb, D., Wu, W., Landrum, M.J., Kimchi, A., Tatusova, T., DiCuccio, M., Kitts, P., Murphy, T.D., Pruitt, K.D., 2016. Reference sequence (RefSeq) database at NCBI: Current status, taxonomic expansion, and functional annotation. *Nucleic Acids Res.* 44, D733-D745.
33. Ng, P.C., Henikoff, S., 2003. SIFT: Predicting amino acid changes that affect protein function. *Nucleic Acids Res.* 31, 3812-3814.
34. Ng, P.C., Henikoff, S., 2006. Predicting the effects of amino acid substitutions on protein function. *Annu. Rev. Genomics Hum. Genet.* 7, 61-80.

35. Fujita, A., Kojima, K., Patriota, A.G., Sato, J.R., Severino, P., Miyano, S., Dopazo, J., 2011. A fast and robust statistical test based on likelihood ratio with Bartlett correction to identify Granger causality between gene sets. *Bioinformatics* 27, 2349-2351.
36. Lubeck, E., Coskun, A.F., Zhiyentayev, T., Ahmad, M., Cai, L., 2012. MutationTaster2: mutation prediction for the deep-sequencing age. *Nat. Methods* 9, 743-748.
37. Reva, B., Antipin, Y., Sander, C., 2007. Determinants of protein function revealed by combinatorial entropy optimization. *Genome Biol.* 8, R232.
38. Reva, B., Antipin, Y., Sander, C., 2011. Predicting the functional impact of protein mutations: Application to cancer genomics. *Nucleic Acids Res.* 39, 37-43.
39. Shihab, H.A., Gough, J., Mort, M., Cooper, D.N., Day, I.N.M., Gaunt, T.R., 2014. Ranking non-synonymous single nucleotide polymorphisms based on disease concepts. *Hum. Genomics* 8, 11.
40. Dong, C., Wei, P., Jian, X., Gibbs, R., Boerwinkle, E., Wang, K., Liu, X., 2015. Comparison and integration of deleteriousness prediction methods for nonsynonymous SNVs in whole exome sequencing studies. *Hum. Mol. Genet.* 24, 2125-2137.
41. Kircher, M., 2014. A general framework for estimating the relative pathogenicity of human genetic variants. *Nat. g* 46, 310-315.
42. Cooper, G.M., Stone, E.A., Asimenos, G., Green, E.D., Batzoglou, S., Sidow, A., 2005. Distribution and intensity of constraint in mammalian genomic sequence. *Genome Res.* 15, 901-913.
43. Adzhubei, I.A., Schmidt, S., Peshkin, L., Ramensky, V.E., Gerasimova, A., Bork, P., Kondrashov, A.S., Sunyaev, S.R., 2010. A method and server for predicting damaging missense mutations. *Nat. Methods* 7, 248-249.
44. Garber, M., Guttman, M., Clamp, M., Zody, M.C., Friedman, N., Xie, X., 2009. Identifying novel constrained elements by exploiting biased substitution patterns. *Bioinformatics* 25, 54-62.
45. Sherry, S., Ward, M., Kholodov, M., Baker, J., Phan, L., Smigielski, E., Sirotkin, K., 2001. dbSNP: the NCBI database of genetic variation. *Nucleic Acids Res* 29, 308-11.
46. Wheeler, D.L. et al. Database resources of the National Center for Biotechnology Information. *Nucleic Acids Res.* 35 (Database issue): D5-1



(2007).

47. Li, M.X. et al. A comprehensive framework for prioritizing variants in exome sequencing studies of Mendelian diseases. *Nucleic acids research*, p.gkr1257 (2012).
48. Li, M.X. et al. Predicting mendelian disease-causing non-synonymous single nucleotide variants in exome sequencing studies. *PLoS Genet*, 9(1), p.e1003143 (2013).
49. Sifrim, A. et al. eXtasy: variant prioritization by genomic data fusion. *Nature methods*, 10(11), 1083-1084 (2013).
50. Robinson, P.N. et al. The human phenotype ontology. *Clinical genetics*, 77(6), 525-534 (2010).
51. Wang, Q., Yu, H., Zhao, Z. and Jia, P., 2015. EW\_dmGWAS: edge-weighted dense module search for genome-wide association studies and gene expression profiles. *Bioinformatics*, p.btv150.
52. Laoutidis, Z.G. and Luckhaus, C., 2015. The Liptak-Stouffer test for meta-analyses. *Biological psychiatry*, 77(1), pp.e1-e2.
53. Wu, J. et al. Integrated network analysis platform for protein-protein interactions. *Nat Meth* 6, 75-77 (2009).
54. Chimusa, E. R. et al. ancGWAS: a Post Genome-wide Association Study Method for Interaction, Pathway, and Ancestry Analysis in Homogeneous and Admixed Populations. *Bioinformatics*, btv619 (2015).
55. Huang, D.W., Sherman, B.T. and Lempicki, R.A., 2009. Bioinformatics enrichment tools: paths toward the comprehensive functional analysis of large gene lists. *Nucleic acids research*, 37(1), pp.1-13.
56. Dennis, G., Sherman, B.T., Hosack, D.A., Yang, J., Gao, W., Lane, H.C. and Lempicki, R.A., 2003. DAVID: database for annotation, visualization, and integrated discovery. *Genome biology*, 4(9), p.R60.
57. Mi, H., Huang, X., Muruganujan, A., Tang, H., Mills, C., Kang, D. and Thomas, P.D., 2016. PANTHER version 11: expanded annotation data from Gene Ontology and Reactome pathways, and data analysis tool enhancements. *Nucleic Acids Research*, p.gkw1138.
58. Kuleshov, M.V., Jones, M.R., Rouillard, A.D., Fernandez, N.F., Duan, Q., Wang, Z., Koplev, S., Jenkins, S.L., Jagodnik, K.M., Lachmann, A.

- and McDermott, M.G., 2016. Enrichr: a comprehensive gene set enrichment analysis web server 2016 update. *Nucleic acids research*, p.gkw377.
59. Kanehisa, M. and Goto, S., 2000. KEGG: kyoto encyclopedia of genes and genomes. *Nucleic acids research*, 28(1), pp.27-30.
60. Nishimura, D., 2001. BioCarta. *Biotech Software & Internet Report: The Computer Software Journal for Scientist*, 2(3), pp.117-120.
61. Croft, D., Mundo, A.F., Haw, R., Milacic, M., Weiser, J., Wu, G., Caudy, M., Garapati, P., Gillespie, M., Kamdar, M.R. and Jassal, B., 2013. The Reactome pathway knowledgebase. *Nucleic acids research*, 42(D1), pp.D472-D477.
62. Reference Genome Group of the Gene Ontology Consortium, 2009. The Gene Ontology's Reference Genome Project: a unified framework for functional annotation across species. *PLoS computational biology*, 5(7), p.e1000431.
63. Evangelou, E. and Ioannidis, J.P., 2013. Meta-analysis methods for genome-wide association studies and beyond. *Nature Reviews Genetics*, 14(6), pp.379-389.
64. Sul, J.H., Han, B., Ye, C., Choi, T. and Eskin, E., 2013. Effectively identifying eQTLs from multiple tissues by combining mixed model and meta-analytic approaches. *PLoS Genet*, 9(6), p.e1003491.
65. Benjamini, Y., Drai, D., Elmer, G., Kafkafi, N. and Golani, I., 2001. Controlling the false discovery rate in behavior genetics research. *Behavioural brain research*, 125(1), pp.279-284.
66. Loh, P.R., Danecek, P., Palamara, P.F., Fuchsberger, C., Reshef, Y.A., Finucane, H.K., Schoenherr, S., Forer, L., McCarthy, S., Abecasis, G.R. and Durbin, R., 2016. Reference-based phasing using the Haplotype Reference Consortium panel. *Nature genetics*, 48(11), pp.1443-1448.
67. B. Howie, C. Fuchsberger, M. Stephens, J. Marchini, and G. R. Abecasis (2012) Fast and accurate genotype imputation in genome-wide association studies through pre-phasing. *Nature Genetics* 44(8): 955-959.
68. Patterson, N., Price, A.L. and Reich, D., 2006. Population structure and eigenanalysis. *PLoS genetics*, 2(12), p.e190.
69. Price, A.L., Patterson, N.J., Plenge, R.M., Weinblatt, M.E., Shadick, N.A. and Reich, D., 2006. Principal components analysis corrects for stratification in genome-wide association studies. *Nature genetics*, 38(8), pp.904-909.

70. Marth, G.T., Czabarka, E., Murvai, J. and Sherry, S.T., 2004. The allele frequency spectrum in genome-wide human variation data reveals signals of differential demographic history in three large world populations. *Genetics*, 166(1), pp.351-372.
71. Price, A.L., Helgason, A., Palsson, S., Stefansson, H., Clair, D.S., Andreassen, O.A., Reich, D., Kong, A. and Stefansson, K., 2009. The impact of divergence time on the nature of population structure: an example from Iceland. *PLoS Genet*, 5(6), p.e1000505.
72. Bhatia, G., Patterson, N., Pasaniuc, B., Zaitlen, N., Genovese, G., Pollack, S., Mallick, S., Myers, S., Tandon, A., Spencer, C. and Palmer, C.D., 2011. Genome-wide comparison of African-ancestry populations from CARE and other cohorts reveals signals of natural selection. *The American Journal of Human Genetics*, 89(3), pp.368-381.
